# Supplementary material for: Parallel evolution between genomic segments of seasonal human influenza viruses reveals RNA-RNA relationships
Source: eLife. 2021 Aug 27;10:e66525. doi: 10.7554/eLife.66525 (PMC8523153; doi:10.7554/eLife.66525)
Supplement: Figure 2—figure supplement 2—source data 1. [file elife-66525-fig2-figsupp2-data1.xlsx]

## Sheet: Replicate 1
	PB2	PB1	PA	HA	NP	NA	M	NS
PB2	0	0.387532	0.345839	0.560295	0.428269	0.323003	0.364098	0.477473
PB1	0.387532	0	0.249209	0.438441	0.351797	0.333171	0.559586	0.465962
PA	0.345839	0.249209	0	0.415022	0.294029	0.350198	0.483966	0.465962
HA	0.560295	0.438441	0.415022	0	0.427656	0.41751	0.580931	0.409614
NP	0.428269	0.351797	0.294029	0.427656	0	0.415322	0.467969	0.553594
NA	0.323003	0.333171	0.350198	0.41751	0.415322	0	0.44858	0.485747
M	0.364098	0.559586	0.483966	0.580931	0.467969	0.44858	0	0.488154
NS	0.477473	0.465962	0.465962	0.409614	0.553594	0.485747	0.488154	0

## Sheet: Replicate 2
	PB2	PB1	PA	HA	NP	NA	M	NS
PB2	0	0.392624	0.357868	0.532279	0.325156	0.317615	0.368687	0.448531
PB1	0.392624	0	0.0754486	0.297624	0.239018	0.274237	0.175962	0.518883
PA	0.357868	0.0754486	0	0.23691	0.163569	0.221594	0.105713	0.464331
HA	0.532279	0.297624	0.23691	0	0.318134	0.344684	0.310945	0.404636
NP	0.325156	0.239018	0.163569	0.318134	0	0.224857	0.216277	0.478694
NA	0.317615	0.274237	0.221594	0.344684	0.224857	0	0.270683	0.38194
M	0.368687	0.175962	0.105713	0.310945	0.216277	0.270683	0	0.485814
NS	0.448531	0.518883	0.464331	0.404636	0.478694	0.38194	0.485814	0

## Sheet: Replicate 3
	PB2	PB1	PA	HA	NP	NA	M	NS
PB2	0	0.409019	0.465282	0.606857	0.512742	0.528384	0.425953	0.570932
PB1	0.409019	0	0.41415	0.36719	0.397387	0.420256	0.365161	0.557625
PA	0.465282	0.41415	0	0.593264	0.383641	0.491768	0.527255	0.66182
HA	0.606857	0.36719	0.593264	0	0.409257	0.372645	0.449008	0.423936
NP	0.512742	0.397387	0.383641	0.409257	0	0.421886	0.443613	0.653485
NA	0.528384	0.420256	0.491768	0.372645	0.421886	0	0.38403	0.510592
M	0.425953	0.365161	0.527255	0.449008	0.443613	0.38403	0	0.495645
NS	0.570932	0.557625	0.66182	0.423936	0.653485	0.510592	0.495645	0

## Sheet: Replicate 4
	PB2	PB1	PA	HA	NP	NA	M	NS
PB2	0	0.439867	0.471034	0.398366	0.532262	0.280018	0.38194	0.548999
PB1	0.439867	0	0.236936	0.502605	0.352927	0.384044	0.413911	0.506032
PA	0.471034	0.236936	0	0.578309	0.384146	0.485442	0.435262	0.555904
HA	0.398366	0.502605	0.578309	0	0.609832	0.336304	0.422054	0.488879
NP	0.532262	0.352927	0.384146	0.609832	0	0.511311	0.61645	0.635149
NA	0.280018	0.384044	0.485442	0.336304	0.511311	0	0.339066	0.592363
M	0.38194	0.413911	0.435262	0.422054	0.61645	0.339066	0	0.667431
NS	0.548999	0.506032	0.555904	0.488879	0.635149	0.592363	0.667431	0

## Sheet: Replicate 5
	PB2	PB1	PA	HA	NP	NA	M	NS
PB2	0	0.276593	0.480509	0.410594	0.397091	0.168125	0.396669	0.372536
PB1	0.276593	0	0.399329	0.39996	0.402643	0.217194	0.400093	0.509396
PA	0.480509	0.399329	0	0.604404	0.399194	0.412081	0.293591	0.483001
HA	0.410594	0.39996	0.604404	0	0.484329	0.410715	0.566795	0.467476
NP	0.397091	0.402643	0.399194	0.484329	0	0.366393	0.530463	0.4109
NA	0.168125	0.217194	0.412081	0.410715	0.366393	0	0.356894	0.456716
M	0.396669	0.400093	0.293591	0.566795	0.530463	0.356894	0	0.553173
NS	0.372536	0.509396	0.483001	0.467476	0.4109	0.456716	0.553173	0

## Sheet: Replicate 6
	PB2	PB1	PA	HA	NP	NA	M	NS
PB2	0	0.391216	0.452722	0.498554	0.456037	0.362212	0.330392	0.345835
PB1	0.391216	0	0.349379	0.320966	0.284099	0.258589	0.416659	0.546207
PA	0.452722	0.349379	0	0.489704	0.432817	0.341498	0.468537	0.560105
HA	0.498554	0.320966	0.489704	0	0.449466	0.411253	0.578179	0.46957
NP	0.456037	0.284099	0.432817	0.449466	0	0.253427	0.523132	0.464157
NA	0.362212	0.258589	0.341498	0.411253	0.253427	0	0.488589	0.47882
M	0.330392	0.416659	0.468537	0.578179	0.523132	0.488589	0	0.478636
NS	0.345835	0.546207	0.560105	0.46957	0.464157	0.47882	0.478636	0

## Sheet: Replicate 7
	PB2	PB1	PA	HA	NP	NA	M	NS
PB2	0	0.19677	0.246694	0.360676	0.339445	0.256364	0.31961	0.388292
PB1	0.19677	0	0.0801897	0.314794	0.245077	0.154972	0.372254	0.448706
PA	0.246694	0.0801897	0	0.369065	0.323408	0.234201	0.450585	0.50383
HA	0.360676	0.314794	0.369065	0	0.284228	0.269509	0.45304	0.385668
NP	0.339445	0.245077	0.323408	0.284228	0	0.0954873	0.468239	0.457532
NA	0.256364	0.154972	0.234201	0.269509	0.0954873	0	0.392587	0.431685
M	0.31961	0.372254	0.450585	0.45304	0.468239	0.392587	0	0.354114
NS	0.388292	0.448706	0.50383	0.385668	0.457532	0.431685	0.354114	0
