# Supplementary material for: Parallel evolution between genomic segments of seasonal human influenza viruses reveals RNA-RNA relationships
Source: eLife. 2021 Aug 27;10:e66525. doi: 10.7554/eLife.66525 (PMC8523153; doi:10.7554/eLife.66525)
Supplement: Figure 2—source data 1. [file elife-66525-fig2-data1.xlsx]

## Sheet: RF
	PB2	PB1	PA	HA	NP	NA	M
PB1	10.8571
PA	12	6.57143
HA	14.8571	11.4286	13.7143
NP	12.5714	8.28571	9.14286	12
NA	8.85714	8.28571	10.2857	11.1429	8.57143
M	11.4286	11.1429	10.8571	14.5714	13.4286	11.4286
NS	12.8571	14.8571	15.1429	12.5714	14.8571	13.7143	14.8571
