# Supplementary material for: Parallel evolution between genomic segments of seasonal human influenza viruses reveals RNA-RNA relationships
Source: eLife. 2021 Aug 27;10:e66525. doi: 10.7554/eLife.66525 (PMC8523153; doi:10.7554/eLife.66525)
Supplement: Figure 3—figure supplement 2—source data 1. [file elife-66525-fig3-figsupp2-data1.xlsx]

## Sheet: Replicate 1
	PB2	PB1	PA	HA	NP	NA	M	NS
PB2	0	0.612557	0.629987	0.666988	0.605522	0.546125	0.639989	0.610275
PB1	0.612557	0	0.250475	0.578833	0.406351	0.285367	0.463992	0.267843
PA	0.629987	0.250475	0	0.571208	0.345764	0.334508	0.50173	0.419156
HA	0.666988	0.578833	0.571208	0	0.606703	0.503921	0.650555	0.662765
NP	0.605522	0.406351	0.345764	0.606703	0	0.453225	0.358598	0.46515
NA	0.546125	0.285367	0.334508	0.503921	0.453225	0	0.499459	0.331846
M	0.639989	0.463992	0.50173	0.650555	0.358598	0.499459	0	0.482462
NS	0.610275	0.267843	0.419156	0.662765	0.46515	0.331846	0.482462	0

## Sheet: Replicate 2
	PB2	PB1	PA	HA	NP	NA	M	NS
PB2	0	0.233018	0.294833	0.428734	0.297922	0.275963	0.347337	0.308252
PB1	0.233018	0	0.161679	0.285603	0.157983	0.0804226	0.276449	0.228584
PA	0.294833	0.161679	0	0.324378	0.310986	0.212657	0.340974	0.187375
HA	0.428734	0.285603	0.324378	0	0.420998	0.342745	0.429197	0.421321
NP	0.297922	0.157983	0.310986	0.420998	0	0.124175	0.212146	0.38294
NA	0.275963	0.0804226	0.212657	0.342745	0.124175	0	0.199939	0.307825
M	0.347337	0.276449	0.340974	0.429197	0.212146	0.199939	0	0.331977
NS	0.308252	0.228584	0.187375	0.421321	0.38294	0.307825	0.331977	0

## Sheet: Replicate 3
	PB2	PB1	PA	HA	NP	NA	M	NS
PB2	0	0.298478	0.236466	0.385659	0.392257	0.377077	0.224369	0.412005
PB1	0.298478	0	0.205985	0.326424	0.407129	0.368555	0.279439	0.343106
PA	0.236466	0.205985	0	0.388631	0.327087	0.348567	0.255943	0.422759
HA	0.385659	0.326424	0.388631	0	0.533913	0.484859	0.382557	0.574951
NP	0.392257	0.407129	0.327087	0.533913	0	0.407425	0.483859	0.421536
NA	0.377077	0.368555	0.348567	0.484859	0.407425	0	0.385898	0.356314
M	0.224369	0.279439	0.255943	0.382557	0.483859	0.385898	0	0.426417
NS	0.412005	0.343106	0.422759	0.574951	0.421536	0.356314	0.426417	0

## Sheet: Replicate 4
	PB2	PB1	PA	HA	NP	NA	M	NS
PB2	0	0.130084	0.233411	0.46679	0.304281	0.371616	0.175592	0.19772
PB1	0.130084	0	0.153751	0.46679	0.204031	0.276456	0.270524	0.112244
PA	0.233411	0.153751	0	0.501137	0.173846	0.160379	0.31636	0.223263
HA	0.46679	0.46679	0.501137	0	0.503992	0.418661	0.5667	0.547374
NP	0.304281	0.204031	0.173846	0.503992	0	0.187904	0.365956	0.207125
NA	0.371616	0.276456	0.160379	0.418661	0.187904	0	0.430244	0.33348
M	0.175592	0.270524	0.31636	0.5667	0.365956	0.430244	0	0.265867
NS	0.19772	0.112244	0.223263	0.547374	0.207125	0.33348	0.265867	0

## Sheet: Replicate 5
	PB2	PB1	PA	HA	NP	NA	M	NS
PB2	0	0.218887	0.246693	0.566082	0.406797	0.390589	0.455057	0.417555
PB1	0.218887	0	0.236189	0.600285	0.419487	0.284262	0.40884	0.399534
PA	0.246693	0.236189	0	0.460793	0.367392	0.279874	0.521889	0.361499
HA	0.566082	0.600285	0.460793	0	0.505786	0.565601	0.64017	0.667223
NP	0.406797	0.419487	0.367392	0.505786	0	0.377963	0.365786	0.5147
NA	0.390589	0.284262	0.279874	0.565601	0.377963	0	0.549984	0.434802
M	0.455057	0.40884	0.521889	0.64017	0.365786	0.549984	0	0.513258
NS	0.417555	0.399534	0.361499	0.667223	0.5147	0.434802	0.513258	0

## Sheet: Replicate 6
	PB2	PB1	PA	HA	NP	NA	M	NS
PB2	0	0.277994	0.260911	0.542252	0.226818	0.320191	0.283904	0.238666
PB1	0.277994	0	0.0801897	0.421808	0.153751	0.160379	0.252309	0.33348
PA	0.260911	0.0801897	0	0.421808	0.12344	0.0801897	0.252309	0.313533
HA	0.542252	0.421808	0.421808	0	0.493395	0.470406	0.435424	0.589648
NP	0.226818	0.153751	0.12344	0.493395	0	0.189669	0.2695	0.28542
NA	0.320191	0.160379	0.0801897	0.470406	0.189669	0	0.310574	0.313533
M	0.283904	0.252309	0.252309	0.435424	0.2695	0.310574	0	0.401523
NS	0.238666	0.33348	0.313533	0.589648	0.28542	0.313533	0.401523	0

## Sheet: Replicate 7
	PB2	PB1	PA	HA	NP	NA	M	NS
PB2	0	0.391093	0.406176	0.574165	0.245797	0.366824	0.252019	0.39114
PB1	0.391093	0	0.180662	0.511331	0.345634	0.266566	0.422836	0.371478
PA	0.406176	0.180662	0	0.485982	0.335561	0.143946	0.415094	0.386867
HA	0.574165	0.511331	0.485982	0	0.531054	0.474752	0.546672	0.579478
NP	0.245797	0.345634	0.335561	0.531054	0	0.367463	0.372911	0.345646
NA	0.366824	0.266566	0.143946	0.474752	0.367463	0	0.389865	0.36298
M	0.252019	0.422836	0.415094	0.546672	0.372911	0.389865	0	0.314073
NS	0.39114	0.371478	0.386867	0.579478	0.345646	0.36298	0.314073	0
