# Supplementary material for: Parallel evolution between genomic segments of seasonal human influenza viruses reveals RNA-RNA relationships
Source: eLife. 2021 Aug 27;10:e66525. doi: 10.7554/eLife.66525 (PMC8523153; doi:10.7554/eLife.66525)
Supplement: Figure 3—source data 1. [file elife-66525-fig3-data1.xlsx]

## Sheet: RF
	PB2	PB1	PA	HA	NP	NA	M
PB1	7.71429
PA	8	4.57143
HA	12.5714	11.4286	11.1429
NP	9.14286	8	6.57143	12
NA	10	6.85714	6	11.7143	7.14286
M	8	8	8.57143	12.5714	8	9.42857
NS	9.14286	7.14286	7.71429	13.7143	9.42857	8.57143	10
