# Supplementary material for: Parallel evolution between genomic segments of seasonal human influenza viruses reveals RNA-RNA relationships
Source: eLife. 2021 Aug 27;10:e66525. doi: 10.7554/eLife.66525 (PMC8523153; doi:10.7554/eLife.66525)
Supplement: Figure 3—source data 2. [file elife-66525-fig3-data2.xlsx]

## Sheet: RF
Segments	Replicate	2005-2014	1995-2004
PB2-PB1	1	12	16
PB2-PA	1	12	16
PB2-HA	1	18	16
PB2-NP	1	14	16
PB2-NA	1	10	14
PB2-M	1	12	14
PB2-NS	1	14	16
PB2-PB1	2	14	6
PB2-PA	2	12	6
PB2-HA	2	16	10
PB2-NP	2	12	8
PB2-NA	2	8	8
PB2-M	2	12	8
PB2-NS	2	12	8
PB2-PB1	3	12	8
PB2-PA	3	12	6
PB2-HA	3	18	10
PB2-NP	3	14	10
PB2-NA	3	16	10
PB2-M	3	14	6
PB2-NS	3	16	10
PB2-PB1	4	14	2
PB2-PA	4	14	6
PB2-HA	4	12	12
PB2-NP	4	14	8
PB2-NA	4	8	10
PB2-M	4	12	4
PB2-NS	4	16	4
PB2-PB1	5	8	6
PB2-PA	5	14	6
PB2-HA	5	14	14
PB2-NP	5	12	10
PB2-NA	5	4	10
PB2-M	5	12	12
PB2-NS	5	10	12
PB2-PB1	6	12	6
PB2-PA	6	14	6
PB2-HA	6	16	12
PB2-NP	6	14	6
PB2-NA	6	10	8
PB2-M	6	10	6
PB2-NS	6	12	6
PB2-PB1	7	4	10
PB2-PA	7	6	10
PB2-HA	7	10	14
PB2-NP	7	8	6
PB2-NA	7	6	10
PB2-M	7	8	6
PB2-NS	7	10	8
PB1-PA	1	6	6
PB1-HA	1	14	14
PB1-NP	1	10	10
PB1-NA	1	8	8
PB1-M	1	16	12
PB1-NS	1	14	6
PB1-PA	2	2	4
PB1-HA	2	10	6
PB1-NP	2	6	4
PB1-NA	2	8	2
PB1-M	2	4	6
PB1-NS	2	16	6
PB1-PA	3	10	6
PB1-HA	3	12	8
PB1-NP	3	10	10
PB1-NA	3	12	12
PB1-M	3	10	6
PB1-NS	3	16	8
PB1-PA	4	6	4
PB1-HA	4	14	12
PB1-NP	4	8	6
PB1-NA	4	12	8
PB1-M	4	12	6
PB1-NS	4	16	2
PB1-PA	5	12	6
PB1-HA	5	12	16
PB1-NP	5	10	12
PB1-NA	5	6	8
PB1-M	5	14	10
PB1-NS	5	14	12
PB1-PA	6	8	2
PB1-HA	6	10	10
PB1-NP	6	8	4
PB1-NA	6	8	4
PB1-M	6	12	6
PB1-NS	6	16	8
PB1-PA	7	2	4
PB1-HA	7	8	14
PB1-NP	7	6	10
PB1-NA	7	4	6
PB1-M	7	10	10
PB1-NS	7	12	8
PA-HA	1	12	12
PA-NP	1	8	8
PA-NA	1	10	8
PA-M	1	14	12
PA-NS	1	14	10
PA-HA	2	8	8
PA-NP	2	4	8
PA-NA	2	6	6
PA-M	2	2	8
PA-NS	2	14	4
PA-HA	3	18	10
PA-NP	3	10	8
PA-NA	3	14	10
PA-M	3	16	6
PA-NS	3	18	10
PA-HA	4	16	14
PA-NP	4	10	4
PA-NA	4	14	4
PA-M	4	12	6
PA-NS	4	16	4
PA-HA	5	18	12
PA-NP	5	12	8
PA-NA	5	12	8
PA-M	5	8	12
PA-NS	5	14	10
PA-HA	6	14	10
PA-NP	6	12	2
PA-NA	6	10	2
PA-M	6	12	6
PA-NS	6	16	8
PA-HA	7	10	12
PA-NP	7	8	8
PA-NA	7	6	4
PA-M	7	12	10
PA-NS	7	14	8
HA-NP	1	12	12
HA-NA	1	14	10
HA-M	1	18	14
HA-NS	1	12	14
HA-NP	2	10	10
HA-NA	2	10	8
HA-M	2	10	10
HA-NS	2	12	10
HA-NP	3	12	14
HA-NA	3	10	14
HA-M	3	12	10
HA-NS	3	12	14
HA-NP	4	16	12
HA-NA	4	10	10
HA-M	4	12	14
HA-NS	4	16	14
HA-NP	5	14	12
HA-NA	5	14	16
HA-M	5	18	16
HA-NS	5	12	16
HA-NP	6	12	12
HA-NA	6	12	12
HA-M	6	18	10
HA-NS	6	14	14
HA-NP	7	8	12
HA-NA	7	8	12
HA-M	7	14	14
HA-NS	7	10	14
NP-NA	1	10	10
NP-M	1	14	10
NP-NS	1	16	12
NP-NA	2	6	2
NP-M	2	6	4
NP-NS	2	14	10
NP-NA	3	12	10
NP-M	3	14	12
NP-NS	3	18	10
NP-NA	4	14	4
NP-M	4	16	8
NP-NS	4	18	6
NP-NA	5	10	10
NP-M	5	16	8
NP-NS	5	12	12
NP-NA	6	6	4
NP-M	6	16	6
NP-NS	6	14	8
NP-NA	7	2	10
NP-M	7	12	8
NP-NS	7	12	8
NA-M	1	14	12
NA-NS	1	14	8
NA-M	2	8	4
NA-NS	2	12	8
NA-M	3	10	10
NA-NS	3	14	10
NA-M	4	10	10
NA-NS	4	18	8
NA-M	5	12	12
NA-NS	5	12	10
NA-M	6	16	8
NA-NS	6	14	8
NA-M	7	10	10
NA-NS	7	12	8
M-NS	1	16	12
M-NS	2	14	10
M-NS	3	14	10
M-NS	4	18	6
M-NS	5	16	14
M-NS	6	16	10
M-NS	7	10	8
