# Supplementary material for: Parallel evolution between genomic segments of seasonal human influenza viruses reveals RNA-RNA relationships
Source: eLife. 2021 Aug 27;10:e66525. doi: 10.7554/eLife.66525 (PMC8523153; doi:10.7554/eLife.66525)
Supplement: Figure 4—figure supplement 2—source data 1. [file elife-66525-fig4-figsupp2-data1.xlsx]

## Sheet: Replicate 1
	PB2	PB1	PA	HA	NP	NA	M	NS
PB2	0	0.389344	0.144415	0	0.389344	0	0.334398	0.389344
PB1	0.389344	0	0.323259	0.389344	0	0.389344	0.133276	0
PA	0.144415	0.323259	0	0.144415	0.323259	0.144415	0.260402	0.323259
HA	0	0.389344	0.144415	0	0.389344	0	0.334398	0.389344
NP	0.389344	0	0.323259	0.389344	0	0.389344	0.133276	0
NA	0	0.389344	0.144415	0	0.389344	0	0.334398	0.389344
M	0.334398	0.133276	0.260402	0.334398	0.133276	0.334398	0	0.133276
NS	0.389344	0	0.323259	0.389344	0	0.389344	0.133276	0

## Sheet: Replicate 2
	PB2	PB1	PA	HA	NP	NA	M	NS
PB2	0	0.469841	0.249044	0.161899	0.31405	0.179345	0.469841	0.323259
PB1	0.469841	0	0.481606	0.456833	0.184185	0.389344	0	0.322351
PA	0.249044	0.481606	0	0.17629	0.439633	0.249044	0.481606	0.462344
HA	0.161899	0.456833	0.17629	0	0.292103	0.268857	0.456833	0.343475
NP	0.31405	0.184185	0.439633	0.292103	0	0.445183	0.184185	0.184185
NA	0.179345	0.389344	0.249044	0.268857	0.445183	0	0.389344	0.472009
M	0.469841	0	0.481606	0.456833	0.184185	0.389344	0	0.322351
NS	0.323259	0.322351	0.462344	0.343475	0.184185	0.472009	0.322351	0

## Sheet: Replicate 3
	PB2	PB1	PA	HA	NP	NA	M	NS
PB2	0	0.393679	0.133276	0.269779	0.393679	0.161899	0.461621	0.383041
PB1	0.393679	0	0.391512	0.368706	0	0.454633	0.302456	0.260402
PA	0.133276	0.391512	0	0.269779	0.391512	0.269779	0.43264	0.424274
HA	0.269779	0.368706	0.269779	0	0.368706	0.137412	0.525353	0.53416
NP	0.393679	0	0.391512	0.368706	0	0.454633	0.302456	0.260402
NA	0.161899	0.454633	0.269779	0.137412	0.454633	0	0.569101	0.475665
M	0.461621	0.302456	0.43264	0.525353	0.302456	0.569101	0	0.259362
NS	0.383041	0.260402	0.424274	0.53416	0.260402	0.475665	0.259362	0

## Sheet: Replicate 4
	PB2	PB1	PA	HA	NP	NA	M	NS
PB2	0	0.323259	0.262218	0.269221	0.393679	0.340548	0.393679	0.349229
PB1	0.323259	0	0.452201	0.467674	0.144415	0.520454	0.144415	0.184185
PA	0.262218	0.452201	0	0.340548	0.452201	0.277692	0.452201	0.516457
HA	0.269221	0.467674	0.340548	0	0.389344	0.262218	0.389344	0.488894
NP	0.393679	0.144415	0.452201	0.389344	0	0.520454	0	0.25871
NA	0.340548	0.520454	0.277692	0.262218	0.520454	0	0.520454	0.566517
M	0.393679	0.144415	0.452201	0.389344	0	0.520454	0	0.25871
NS	0.349229	0.184185	0.516457	0.488894	0.25871	0.566517	0.25871	0

## Sheet: Replicate 5
	PB2	PB1	PA	HA	NP	NA	M	NS
PB2	0	0.323259	0.262218	0.340548	0.393679	0.234291	0.39242	0.349229
PB1	0.323259	0	0.452201	0.522621	0.144415	0.437987	0.133276	0.184185
PA	0.262218	0.452201	0	0.40033	0.452201	0.40033	0.391512	0.516457
HA	0.340548	0.522621	0.40033	0	0.437987	0.133276	0.598784	0.568699
NP	0.393679	0.144415	0.452201	0.437987	0	0.522621	0.269221	0.25871
NA	0.234291	0.437987	0.40033	0.133276	0.522621	0	0.520454	0.524988
M	0.39242	0.133276	0.391512	0.598784	0.269221	0.520454	0	0.26399
NS	0.349229	0.184185	0.516457	0.568699	0.25871	0.524988	0.26399	0

## Sheet: Replicate 6
	PB2	PB1	PA	HA	NP	NA	M	NS
PB2	0	0.323259	0	0.269221	0.323259	0.144415	0.323259	0.383041
PB1	0.323259	0	0.323259	0.467674	0	0.389344	0	0.175769
PA	0	0.323259	0	0.269221	0.323259	0.144415	0.323259	0.383041
HA	0.269221	0.467674	0.269221	0	0.467674	0.133276	0.467674	0.527456
NP	0.323259	0	0.323259	0.467674	0	0.389344	0	0.175769
NA	0.144415	0.389344	0.144415	0.133276	0.389344	0	0.389344	0.484056
M	0.323259	0	0.323259	0.467674	0	0.389344	0	0.175769
NS	0.383041	0.175769	0.383041	0.527456	0.175769	0.484056	0.175769	0

## Sheet: Replicate 7
	PB2	PB1	PA	HA	NP	NA	M	NS
PB2	0	0.252226	0	0.144415	0.252226	0.269221	0.252226	0.391512
PB1	0.252226	0	0.252226	0.319321	0	0.427201	0	0.161899
PA	0	0.252226	0	0.144415	0.252226	0.269221	0.252226	0.391512
HA	0.144415	0.319321	0.144415	0	0.319321	0.133276	0.319321	0.465507
NP	0.252226	0	0.252226	0.319321	0	0.427201	0	0.161899
NA	0.269221	0.427201	0.269221	0.133276	0.427201	0	0.427201	0.389344
M	0.252226	0	0.252226	0.319321	0	0.427201	0	0.161899
NS	0.391512	0.161899	0.391512	0.465507	0.161899	0.389344	0.161899	0
