# Supplementary material for: Parallel evolution between genomic segments of seasonal human influenza viruses reveals RNA-RNA relationships
Source: eLife. 2021 Aug 27;10:e66525. doi: 10.7554/eLife.66525 (PMC8523153; doi:10.7554/eLife.66525)
Supplement: Figure 4—source data 1. [file elife-66525-fig4-data1.xlsx]

## Sheet: RF
	PB2	PB1	PA	HA	NP	NA	M
PB1	6.28571
PA	2.28571	6.57143
HA	3.14286	8	3.71429
NP	6	0.857143	6.57143	7.71429
NA	2.85714	8.57143	3.71429	2.28571	8.57143
M	6.28571	1.42857	6	7.71429	1.71429	8.28571
NS	6.28571	2.28571	6.85714	8	2.57143	8.57143	3.14286
