# Supplementary material for: Parallel evolution between genomic segments of seasonal human influenza viruses reveals RNA-RNA relationships
Source: eLife. 2021 Aug 27;10:e66525. doi: 10.7554/eLife.66525 (PMC8523153; doi:10.7554/eLife.66525)
Supplement: Figure 5—figure supplement 2—source data 1. [file elife-66525-fig5-figsupp2-data1.xlsx]

## Sheet: Replicate 1
	PB2	PB1	PA	HA	NP	NA	M	NS
PB2	0	0.127622	0.37854	0.138288	0.127622	0	0.251093	0.127622
PB1	0.127622	0	0.275304	0.257798	0.251093	0.127622	0.127622	0.251093
PA	0.37854	0.275304	0	0.326583	0.44784	0.37854	0.344604	0.44784
HA	0.138288	0.257798	0.326583	0	0.224351	0.138288	0.326099	0.224351
NP	0.127622	0.251093	0.44784	0.224351	0	0.127622	0.127622	0
NA	0	0.127622	0.37854	0.138288	0.127622	0	0.251093	0.127622
M	0.251093	0.127622	0.344604	0.326099	0.127622	0.251093	0	0.127622
NS	0.127622	0.251093	0.44784	0.224351	0	0.127622	0.127622	0

## Sheet: Replicate 2
	PB2	PB1	PA	HA	NP	NA	M	NS
PB2	0	0.224351	0.36932	0.249354	0.257798	0.224351	0.265448	0.334268
PB1	0.224351	0	0.457937	0.257798	0.251093	0.127622	0.335776	0.154929
PA	0.36932	0.457937	0	0.33488	0.439648	0.457937	0.286577	0.463498
HA	0.249354	0.257798	0.33488	0	0.224351	0.257798	0.265448	0.258165
NP	0.257798	0.251093	0.439648	0.224351	0	0.251093	0.335776	0.327465
NA	0.224351	0.127622	0.457937	0.257798	0.251093	0	0.335776	0.258165
M	0.265448	0.335776	0.286577	0.265448	0.335776	0.335776	0	0.208279
NS	0.334268	0.154929	0.463498	0.258165	0.327465	0.258165	0.208279	0

## Sheet: Replicate 3
	PB2	PB1	PA	HA	NP	NA	M	NS
PB2	0	0.202189	0.52116	0.257283	0.258165	0.202189	0.257648	0.257648
PB1	0.202189	0	0.36932	0.376975	0.326099	0.224351	0.38677	0.38677
PA	0.52116	0.36932	0	0.405208	0.528265	0.457937	0.463498	0.463498
HA	0.257283	0.376975	0.405208	0	0.32523	0.32523	0.154929	0.154929
NP	0.258165	0.326099	0.528265	0.32523	0	0.251093	0.334268	0.334268
NA	0.202189	0.224351	0.457937	0.32523	0.251093	0	0.326583	0.326583
M	0.257648	0.38677	0.463498	0.154929	0.334268	0.326583	0	0
NS	0.257648	0.38677	0.463498	0.154929	0.334268	0.326583	0	0

## Sheet: Replicate 4
	PB2	PB1	PA	HA	NP	NA	M	NS
PB2	0	0.138288	0.275304	0.239167	0.127622	0.32523	0.258165	0
PB1	0.138288	0	0.349302	0.306599	0.257798	0.392662	0.334268	0.138288
PA	0.275304	0.349302	0	0.154929	0.344604	0.326583	0.382841	0.275304
HA	0.239167	0.306599	0.154929	0	0.309544	0.32523	0.326583	0.239167
NP	0.127622	0.257798	0.344604	0.309544	0	0.426979	0.327465	0.127622
NA	0.32523	0.392662	0.326583	0.32523	0.426979	0	0.37854	0.32523
M	0.258165	0.334268	0.382841	0.326583	0.327465	0.37854	0	0.258165
NS	0	0.138288	0.275304	0.239167	0.127622	0.32523	0.258165	0

## Sheet: Replicate 5
	PB2	PB1	PA	HA	NP	NA	M	NS
PB2	0	0.263834	0.436622	0.257798	0.251093	0.127622	0.258165	0.258165
PB1	0.263834	0	0.436622	0.376975	0.38542	0.26591	0.326583	0.326583
PA	0.436622	0.436622	0	0.315365	0.418601	0.349302	0.441785	0.441785
HA	0.257798	0.376975	0.315365	0	0.224351	0.138288	0.258165	0.258165
NP	0.251093	0.38542	0.418601	0.224351	0	0.127622	0.327465	0.327465
NA	0.127622	0.26591	0.349302	0.138288	0.127622	0	0.258165	0.258165
M	0.258165	0.326583	0.441785	0.258165	0.327465	0.258165	0	0
NS	0.258165	0.326583	0.441785	0.258165	0.327465	0.258165	0	0

## Sheet: Replicate 6
	PB2	PB1	PA	HA	NP	NA	M	NS
PB2	0	0.138288	0.476683	0.249354	0.258165	0.138288	0.334268	0.138288
PB1	0.138288	0	0.476683	0.138288	0.258165	0	0.258165	0
PA	0.476683	0.476683	0	0.442747	0.439648	0.476683	0.480304	0.476683
HA	0.249354	0.138288	0.442747	0	0.334268	0.138288	0.258165	0.138288
NP	0.258165	0.258165	0.439648	0.334268	0	0.258165	0.406104	0.258165
NA	0.138288	0	0.476683	0.138288	0.258165	0	0.258165	0
M	0.334268	0.258165	0.480304	0.258165	0.406104	0.258165	0	0.258165
NS	0.138288	0	0.476683	0.138288	0.258165	0	0.258165	0

## Sheet: Replicate 7
	PB2	PB1	PA	HA	NP	NA	M	NS
PB2	0	0.38542	0.436622	0.249354	0.251093	0.224351	0.257283	0.257283
PB1	0.38542	0	0.505922	0.393531	0.263834	0.257798	0.403568	0.403568
PA	0.436622	0.505922	0	0.326583	0.545983	0.37854	0.382841	0.382841
HA	0.249354	0.393531	0.326583	0	0.401106	0.257798	0.154929	0.154929
NP	0.251093	0.263834	0.545983	0.401106	0	0.383345	0.403568	0.403568
NA	0.224351	0.257798	0.37854	0.257798	0.383345	0	0.258165	0.258165
M	0.257283	0.403568	0.382841	0.154929	0.403568	0.258165	0	0
NS	0.257283	0.403568	0.382841	0.154929	0.403568	0.258165	0	0
