# Supplementary material for: Parallel evolution between genomic segments of seasonal human influenza viruses reveals RNA-RNA relationships
Source: eLife. 2021 Aug 27;10:e66525. doi: 10.7554/eLife.66525 (PMC8523153; doi:10.7554/eLife.66525)
Supplement: Figure 5—source data 1. [file elife-66525-fig5-data1.xlsx]

## Sheet: RF
	PB2	PB1	PA	HA	NP	NA	M
PB1	3.42857
PA	6.85714	7.14286
HA	3.71429	5.14286	6
NP	3.42857	4.57143	8.28571	5.42857
NA	3.14286	3.42857	6.85714	3.71429	4.28571
M	4.28571	5.42857	6.57143	4	6	4.85714
NS	3.14286	4	7.14286	3.14286	4.57143	3.71429	2
