# Supplementary material for: Parallel evolution between genomic segments of seasonal human influenza viruses reveals RNA-RNA relationships
Source: eLife. 2021 Aug 27;10:e66525. doi: 10.7554/eLife.66525 (PMC8523153; doi:10.7554/eLife.66525)
Supplement: Figure 5—source data 2. [file elife-66525-fig5-data2.xlsx]

## Sheet: RF
Segments	Replicate	Year	RF
PB2-PB1	1	2000-2008	8
PB2-PA	1	2000-2008	2
PB2-HA	1	2000-2008	0
PB2-NP	1	2000-2008	8
PB2-NA	1	2000-2008	0
PB2-M	1	2000-2008	6
PB2-NS	1	2000-2008	8
PB2-PB1	2	2000-2008	8
PB2-PA	2	2000-2008	4
PB2-HA	2	2000-2008	2
PB2-NP	2	2000-2008	6
PB2-NA	2	2000-2008	2
PB2-M	2	2000-2008	8
PB2-NS	2	2000-2008	6
PB2-PB1	3	2000-2008	6
PB2-PA	3	2000-2008	2
PB2-HA	3	2000-2008	4
PB2-NP	3	2000-2008	6
PB2-NA	3	2000-2008	2
PB2-M	3	2000-2008	6
PB2-NS	3	2000-2008	6
PB2-PB1	4	2000-2008	6
PB2-PA	4	2000-2008	4
PB2-HA	4	2000-2008	4
PB2-NP	4	2000-2008	6
PB2-NA	4	2000-2008	6
PB2-M	4	2000-2008	6
PB2-NS	4	2000-2008	6
PB2-PB1	5	2000-2008	6
PB2-PA	5	2000-2008	4
PB2-HA	5	2000-2008	6
PB2-NP	5	2000-2008	6
PB2-NA	5	2000-2008	4
PB2-M	5	2000-2008	8
PB2-NS	5	2000-2008	6
PB2-PB1	6	2000-2008	6
PB2-PA	6	2000-2008	0
PB2-HA	6	2000-2008	4
PB2-NP	6	2000-2008	6
PB2-NA	6	2000-2008	2
PB2-M	6	2000-2008	6
PB2-NS	6	2000-2008	6
PB2-PB1	7	2000-2008	4
PB2-PA	7	2000-2008	0
PB2-HA	7	2000-2008	2
PB2-NP	7	2000-2008	4
PB2-NA	7	2000-2008	4
PB2-M	7	2000-2008	4
PB2-NS	7	2000-2008	6
PB1-PA	1	2000-2008	6
PB1-HA	1	2000-2008	8
PB1-NP	1	2000-2008	0
PB1-NA	1	2000-2008	8
PB1-M	1	2000-2008	2
PB1-NS	1	2000-2008	0
PB1-PA	2	2000-2008	8
PB1-HA	2	2000-2008	8
PB1-NP	2	2000-2008	2
PB1-NA	2	2000-2008	8
PB1-M	2	2000-2008	0
PB1-NS	2	2000-2008	4
PB1-PA	3	2000-2008	6
PB1-HA	3	2000-2008	8
PB1-NP	3	2000-2008	0
PB1-NA	3	2000-2008	8
PB1-M	3	2000-2008	4
PB1-NS	3	2000-2008	4
PB1-PA	4	2000-2008	8
PB1-HA	4	2000-2008	8
PB1-NP	4	2000-2008	2
PB1-NA	4	2000-2008	10
PB1-M	4	2000-2008	2
PB1-NS	4	2000-2008	2
PB1-PA	5	2000-2008	8
PB1-HA	5	2000-2008	10
PB1-NP	5	2000-2008	2
PB1-NA	5	2000-2008	10
PB1-M	5	2000-2008	2
PB1-NS	5	2000-2008	2
PB1-PA	6	2000-2008	6
PB1-HA	6	2000-2008	8
PB1-NP	6	2000-2008	0
PB1-NA	6	2000-2008	8
PB1-M	6	2000-2008	0
PB1-NS	6	2000-2008	2
PB1-PA	7	2000-2008	4
PB1-HA	7	2000-2008	6
PB1-NP	7	2000-2008	0
PB1-NA	7	2000-2008	8
PB1-M	7	2000-2008	0
PB1-NS	7	2000-2008	2
PA-HA	1	2000-2008	2
PA-NP	1	2000-2008	6
PA-NA	1	2000-2008	2
PA-M	1	2000-2008	4
PA-NS	1	2000-2008	6
PA-HA	2	2000-2008	2
PA-NP	2	2000-2008	8
PA-NA	2	2000-2008	4
PA-M	2	2000-2008	8
PA-NS	2	2000-2008	8
PA-HA	3	2000-2008	4
PA-NP	3	2000-2008	6
PA-NA	3	2000-2008	4
PA-M	3	2000-2008	6
PA-NS	3	2000-2008	6
PA-HA	4	2000-2008	6
PA-NP	4	2000-2008	8
PA-NA	4	2000-2008	4
PA-M	4	2000-2008	8
PA-NS	4	2000-2008	8
PA-HA	5	2000-2008	6
PA-NP	5	2000-2008	8
PA-NA	5	2000-2008	6
PA-M	5	2000-2008	6
PA-NS	5	2000-2008	8
PA-HA	6	2000-2008	4
PA-NP	6	2000-2008	6
PA-NA	6	2000-2008	2
PA-M	6	2000-2008	6
PA-NS	6	2000-2008	6
PA-HA	7	2000-2008	2
PA-NP	7	2000-2008	4
PA-NA	7	2000-2008	4
PA-M	7	2000-2008	4
PA-NS	7	2000-2008	6
HA-NP	1	2000-2008	8
HA-NA	1	2000-2008	0
HA-M	1	2000-2008	6
HA-NS	1	2000-2008	8
HA-NP	2	2000-2008	6
HA-NA	2	2000-2008	4
HA-M	2	2000-2008	8
HA-NS	2	2000-2008	6
HA-NP	3	2000-2008	8
HA-NA	3	2000-2008	2
HA-M	3	2000-2008	8
HA-NS	3	2000-2008	8
HA-NP	4	2000-2008	8
HA-NA	4	2000-2008	4
HA-M	4	2000-2008	8
HA-NS	4	2000-2008	8
HA-NP	5	2000-2008	10
HA-NA	5	2000-2008	2
HA-M	5	2000-2008	10
HA-NS	5	2000-2008	10
HA-NP	6	2000-2008	8
HA-NA	6	2000-2008	2
HA-M	6	2000-2008	8
HA-NS	6	2000-2008	8
HA-NP	7	2000-2008	6
HA-NA	7	2000-2008	2
HA-M	7	2000-2008	6
HA-NS	7	2000-2008	8
NP-NA	1	2000-2008	8
NP-M	1	2000-2008	2
NP-NS	1	2000-2008	0
NP-NA	2	2000-2008	8
NP-M	2	2000-2008	2
NP-NS	2	2000-2008	2
NP-NA	3	2000-2008	8
NP-M	3	2000-2008	4
NP-NS	3	2000-2008	4
NP-NA	4	2000-2008	10
NP-M	4	2000-2008	0
NP-NS	4	2000-2008	4
NP-NA	5	2000-2008	10
NP-M	5	2000-2008	4
NP-NS	5	2000-2008	4
NP-NA	6	2000-2008	8
NP-M	6	2000-2008	0
NP-NS	6	2000-2008	2
NP-NA	7	2000-2008	8
NP-M	7	2000-2008	0
NP-NS	7	2000-2008	2
NA-M	1	2000-2008	6
NA-NS	1	2000-2008	8
NA-M	2	2000-2008	8
NA-NS	2	2000-2008	8
NA-M	3	2000-2008	8
NA-NS	3	2000-2008	8
NA-M	4	2000-2008	10
NA-NS	4	2000-2008	10
NA-M	5	2000-2008	10
NA-NS	5	2000-2008	10
NA-M	6	2000-2008	8
NA-NS	6	2000-2008	8
NA-M	7	2000-2008	8
NA-NS	7	2000-2008	8
M-NS	1	2000-2008	2
M-NS	2	2000-2008	4
M-NS	3	2000-2008	4
M-NS	4	2000-2008	4
M-NS	5	2000-2008	4
M-NS	6	2000-2008	2
M-NS	7	2000-2008	2
PB2-PB1	1	2010-2018	2
PB2-PA	1	2010-2018	6
PB2-HA	1	2010-2018	2
PB2-NP	1	2010-2018	2
PB2-NA	1	2010-2018	0
PB2-M	1	2010-2018	4
PB2-NS	1	2010-2018	2
PB2-PB1	2	2010-2018	4
PB2-PA	2	2010-2018	6
PB2-HA	2	2010-2018	4
PB2-NP	2	2010-2018	4
PB2-NA	2	2010-2018	4
PB2-M	2	2010-2018	4
PB2-NS	2	2010-2018	6
PB2-PB1	3	2010-2018	4
PB2-PA	3	2010-2018	8
PB2-HA	3	2010-2018	4
PB2-NP	3	2010-2018	4
PB2-NA	3	2010-2018	4
PB2-M	3	2010-2018	4
PB2-NS	3	2010-2018	4
PB2-PB1	4	2010-2018	2
PB2-PA	4	2010-2018	4
PB2-HA	4	2010-2018	4
PB2-NP	4	2010-2018	2
PB2-NA	4	2010-2018	6
PB2-M	4	2010-2018	4
PB2-NS	4	2010-2018	0
PB2-PB1	5	2010-2018	4
PB2-PA	5	2010-2018	8
PB2-HA	5	2010-2018	4
PB2-NP	5	2010-2018	4
PB2-NA	5	2010-2018	2
PB2-M	5	2010-2018	4
PB2-NS	5	2010-2018	4
PB2-PB1	6	2010-2018	2
PB2-PA	6	2010-2018	8
PB2-HA	6	2010-2018	4
PB2-NP	6	2010-2018	4
PB2-NA	6	2010-2018	2
PB2-M	6	2010-2018	6
PB2-NS	6	2010-2018	2
PB2-PB1	7	2010-2018	6
PB2-PA	7	2010-2018	8
PB2-HA	7	2010-2018	4
PB2-NP	7	2010-2018	4
PB2-NA	7	2010-2018	4
PB2-M	7	2010-2018	4
PB2-NS	7	2010-2018	4
PB1-PA	1	2010-2018	4
PB1-HA	1	2010-2018	4
PB1-NP	1	2010-2018	4
PB1-NA	1	2010-2018	2
PB1-M	1	2010-2018	2
PB1-NS	1	2010-2018	4
PB1-PA	2	2010-2018	8
PB1-HA	2	2010-2018	4
PB1-NP	2	2010-2018	4
PB1-NA	2	2010-2018	2
PB1-M	2	2010-2018	6
PB1-NS	2	2010-2018	2
PB1-PA	3	2010-2018	6
PB1-HA	3	2010-2018	6
PB1-NP	3	2010-2018	6
PB1-NA	3	2010-2018	4
PB1-M	3	2010-2018	6
PB1-NS	3	2010-2018	6
PB1-PA	4	2010-2018	6
PB1-HA	4	2010-2018	6
PB1-NP	4	2010-2018	4
PB1-NA	4	2010-2018	8
PB1-M	4	2010-2018	6
PB1-NS	4	2010-2018	2
PB1-PA	5	2010-2018	8
PB1-HA	5	2010-2018	6
PB1-NP	5	2010-2018	6
PB1-NA	5	2010-2018	4
PB1-M	5	2010-2018	6
PB1-NS	5	2010-2018	6
PB1-PA	6	2010-2018	8
PB1-HA	6	2010-2018	2
PB1-NP	6	2010-2018	4
PB1-NA	6	2010-2018	0
PB1-M	6	2010-2018	4
PB1-NS	6	2010-2018	0
PB1-PA	7	2010-2018	10
PB1-HA	7	2010-2018	8
PB1-NP	7	2010-2018	4
PB1-NA	7	2010-2018	4
PB1-M	7	2010-2018	8
PB1-NS	7	2010-2018	8
PA-HA	1	2010-2018	6
PA-NP	1	2010-2018	8
PA-NA	1	2010-2018	6
PA-M	1	2010-2018	6
PA-NS	1	2010-2018	8
PA-HA	2	2010-2018	6
PA-NP	2	2010-2018	8
PA-NA	2	2010-2018	8
PA-M	2	2010-2018	4
PA-NS	2	2010-2018	8
PA-HA	3	2010-2018	8
PA-NP	3	2010-2018	10
PA-NA	3	2010-2018	8
PA-M	3	2010-2018	8
PA-NS	3	2010-2018	8
PA-HA	4	2010-2018	2
PA-NP	4	2010-2018	6
PA-NA	4	2010-2018	6
PA-M	4	2010-2018	6
PA-NS	4	2010-2018	4
PA-HA	5	2010-2018	6
PA-NP	5	2010-2018	8
PA-NA	5	2010-2018	6
PA-M	5	2010-2018	8
PA-NS	5	2010-2018	8
PA-HA	6	2010-2018	8
PA-NP	6	2010-2018	8
PA-NA	6	2010-2018	8
PA-M	6	2010-2018	8
PA-NS	6	2010-2018	8
PA-HA	7	2010-2018	6
PA-NP	7	2010-2018	10
PA-NA	7	2010-2018	6
PA-M	7	2010-2018	6
PA-NS	7	2010-2018	6
HA-NP	1	2010-2018	4
HA-NA	1	2010-2018	2
HA-M	1	2010-2018	6
HA-NS	1	2010-2018	4
HA-NP	2	2010-2018	4
HA-NA	2	2010-2018	4
HA-M	2	2010-2018	4
HA-NS	2	2010-2018	4
HA-NP	3	2010-2018	6
HA-NA	3	2010-2018	6
HA-M	3	2010-2018	2
HA-NS	3	2010-2018	2
HA-NP	4	2010-2018	6
HA-NA	4	2010-2018	6
HA-M	4	2010-2018	6
HA-NS	4	2010-2018	4
HA-NP	5	2010-2018	4
HA-NA	5	2010-2018	2
HA-M	5	2010-2018	4
HA-NS	5	2010-2018	4
HA-NP	6	2010-2018	6
HA-NA	6	2010-2018	2
HA-M	6	2010-2018	4
HA-NS	6	2010-2018	2
HA-NP	7	2010-2018	8
HA-NA	7	2010-2018	4
HA-M	7	2010-2018	2
HA-NS	7	2010-2018	2
NP-NA	1	2010-2018	2
NP-M	1	2010-2018	2
NP-NS	1	2010-2018	0
NP-NA	2	2010-2018	4
NP-M	2	2010-2018	6
NP-NS	2	2010-2018	6
NP-NA	3	2010-2018	4
NP-M	3	2010-2018	6
NP-NS	3	2010-2018	6
NP-NA	4	2010-2018	8
NP-M	4	2010-2018	6
NP-NS	4	2010-2018	2
NP-NA	5	2010-2018	2
NP-M	5	2010-2018	6
NP-NS	5	2010-2018	6
NP-NA	6	2010-2018	4
NP-M	6	2010-2018	8
NP-NS	6	2010-2018	4
NP-NA	7	2010-2018	6
NP-M	7	2010-2018	8
NP-NS	7	2010-2018	8
NA-M	1	2010-2018	4
NA-NS	1	2010-2018	2
NA-M	2	2010-2018	6
NA-NS	2	2010-2018	4
NA-M	3	2010-2018	6
NA-NS	3	2010-2018	6
NA-M	4	2010-2018	6
NA-NS	4	2010-2018	6
NA-M	5	2010-2018	4
NA-NS	5	2010-2018	4
NA-M	6	2010-2018	4
NA-NS	6	2010-2018	0
NA-M	7	2010-2018	4
NA-NS	7	2010-2018	4
M-NS	1	2010-2018	2
M-NS	2	2010-2018	4
M-NS	3	2010-2018	0
M-NS	4	2010-2018	4
M-NS	5	2010-2018	0
M-NS	6	2010-2018	4
M-NS	7	2010-2018	0
