# Supplementary material for: Parallel evolution between genomic segments of seasonal human influenza viruses reveals RNA-RNA relationships
Source: eLife. 2021 Aug 27;10:e66525. doi: 10.7554/eLife.66525 (PMC8523153; doi:10.7554/eLife.66525)
Supplement: Figure 6—source data 1. [file elife-66525-fig6-data1.xlsx]

## Sheet: RF
Segment 1	Segment 2	Gene	Protein
PB2	PB1	10.8571	11.7143
PB2	PA	12	14.8571
PB2	HA	14.8571	11
PB2	NP	12.5714	14.4286
PB2	NA	8.85714	11.5714
PB2	M	11.4286	15.9286
PB2	NS	12.8571	14.5714
PB1	PA	6.57143	10.8571
PB1	HA	11.4286	11.8571
PB1	NP	8.28571	14.1429
PB1	NA	8.28571	11.5714
PB1	M	11.1429	15.2143
PB1	NS	14.8571	14.7143
PA	HA	13.7143	14.4286
PA	NP	9.14286	16.4286
PA	NA	10.2857	13
PA	M	10.8571	15.3571
PA	NS	15.1429	14.7143
HA	NP	12	13.4286
HA	NA	11.1429	7.14286
HA	M	14.5714	15.3571
HA	NS	12.5714	12.2857
NP	NA	8.57143	13.4286
NP	M	13.4286	15.0714
NP	NS	14.8571	16
NA	M	11.4286	15.2143
NA	NS	13.7143	13.2857
M	NS	14.8571	16.3571
