# Supplementary material for: Parallel evolution between genomic segments of seasonal human influenza viruses reveals RNA-RNA relationships
Source: eLife. 2021 Aug 27;10:e66525. doi: 10.7554/eLife.66525 (PMC8523153; doi:10.7554/eLife.66525)
Supplement: Figure 7—source data 1. [file elife-66525-fig7-data1.xlsx]

## Sheet: Nuclear Colocalization
Cell	Segments	Percentage
1	PB2-NA	51.6129
1	NA-NS	25.8065
1	PB2-NS	22.5806
2	PB2-NA	47.619
2	NA-NS	30.9524
2	PB2-NS	21.4286
3	PB2-NA	40.7407
3	NA-NS	18.5185
3	PB2-NS	40.7407
4	PB2-NA	29.6296
4	NA-NS	31.4815
4	PB2-NS	38.8889
5	PB2-NA	43.9024
5	NA-NS	34.1463
5	PB2-NS	21.9512
6	PB2-NA	33.3333
6	NA-NS	66.6667
6	PB2-NS	0
7	PB2-NA	46.6667
7	NA-NS	33.3333
7	PB2-NS	20
8	PB2-NA	70
8	NA-NS	20
8	PB2-NS	10
9	PB2-NA	72.9167
9	NA-NS	18.75
9	PB2-NS	8.33333
10	PB2-NA	55.1724
10	NA-NS	34.4828
10	PB2-NS	10.3448
11	PB2-NA	79.1667
11	NA-NS	16.6667
11	PB2-NS	4.16667
12	PB2-NA	58.8235
12	NA-NS	29.4118
12	PB2-NS	11.7647
13	PB2-NA	85.4962
13	NA-NS	9.92366
13	PB2-NS	4.58015
14	PB2-NA	59.5238
14	NA-NS	26.1905
14	PB2-NS	14.2857
15	PB2-NA	82.5
15	NA-NS	7.5
15	PB2-NS	10
