# Supplementary material for: Parallel evolution between genomic segments of seasonal human influenza viruses reveals RNA-RNA relationships
Source: eLife journal article supplement (doi:10.7554/elife.66525), 2021-08-27
Supplement: supp [file elife-66525-supp-v1.zip]

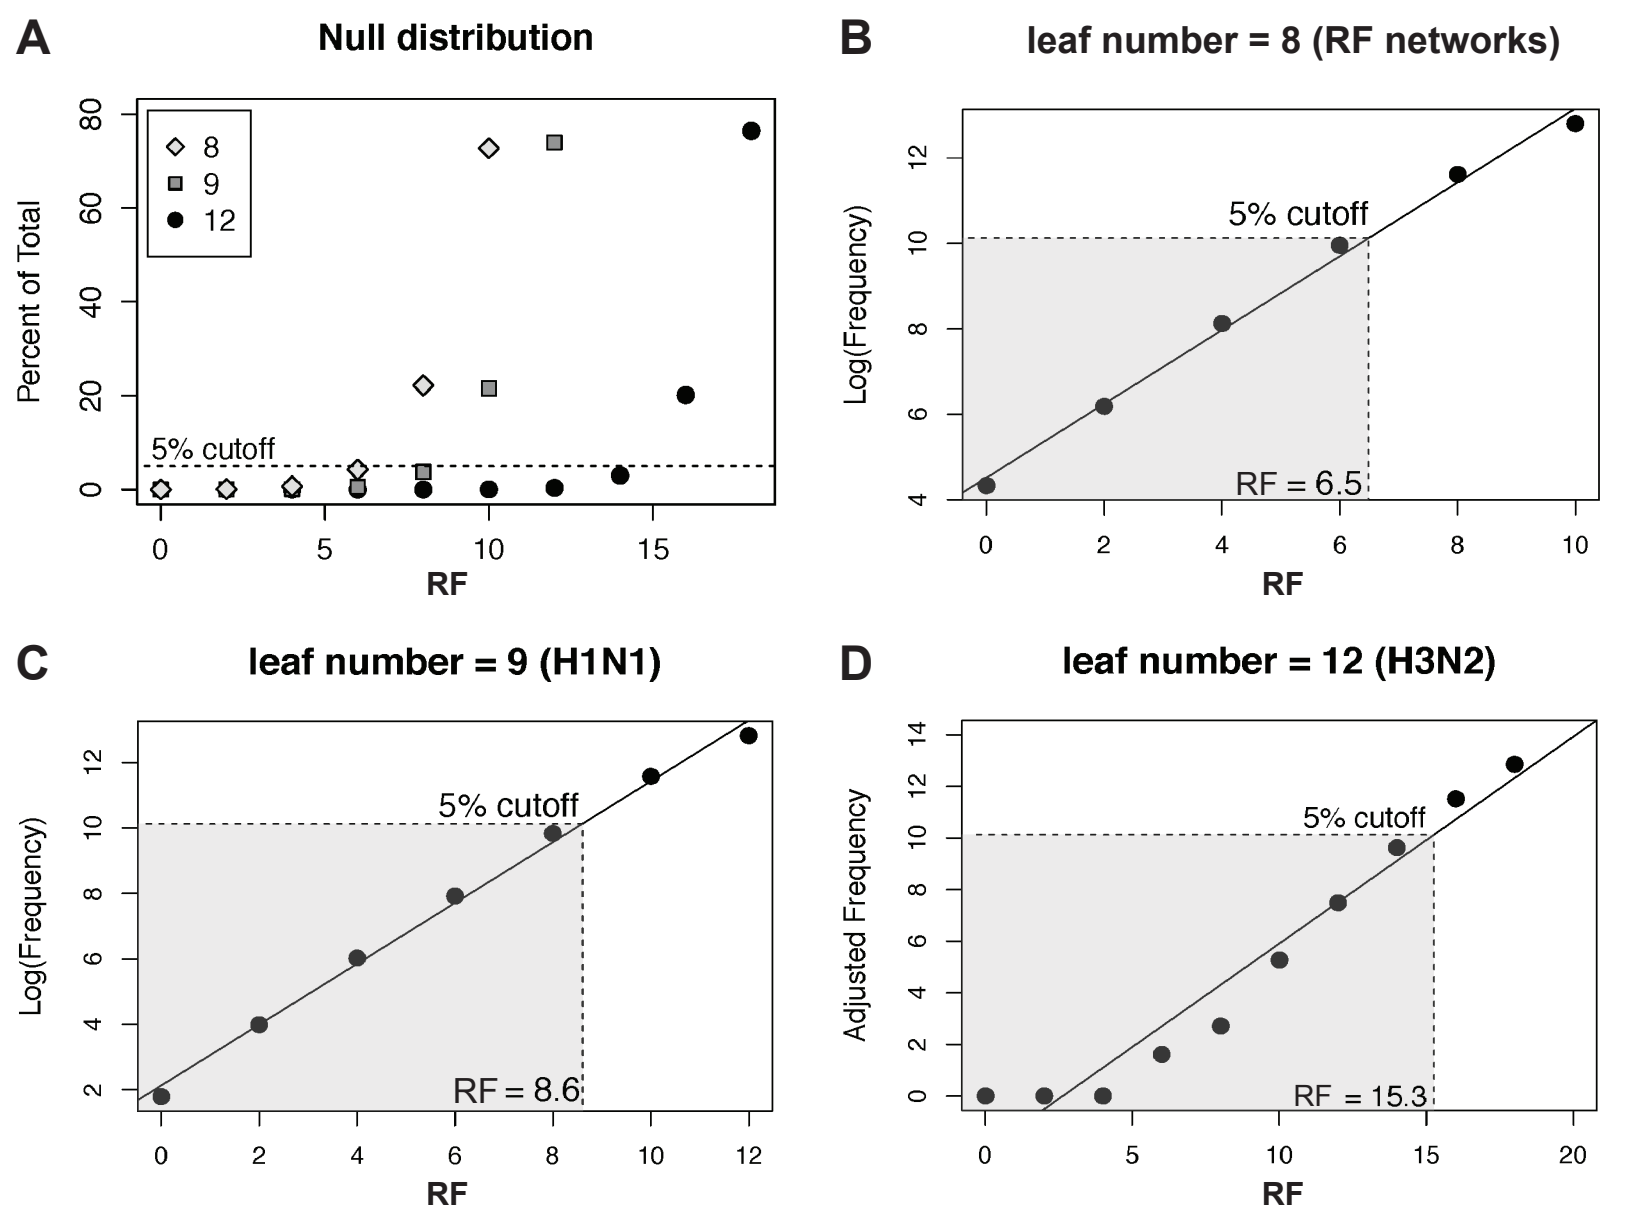

**Figure 2 - figure supplement 3. Null distribution of Robinson-Foulds distances (RF).** **A**, The null distribution of RF distances in sets of 1,000 randomly sampled, unrooted trees with either 8 (gray diamonds, corresponding to the number of tips in tree distance networks), 9 (gray squares, the number of tips in each H1N1 tree), or 12 (black circles, the number of tips in each H3N2 tree) leaf tips was determined. A dashed line demarcates the threshold for the 95% confidence interval. **B-D**, The null distributions shown in **A** were log transformed (**B**, **C**) or Yeo-Johnson transformed (Yeo & Johnson, 2000) (**D**) and fit to a linear regression model to establish the cutoff for the first five percentiles (shaded region), which was set as the 95% confidence interval cutoff. The distance at which 95% confidence is exceeded is indicated.
