# Supplementary material for: Parallel evolution between genomic segments of seasonal human influenza viruses reveals RNA-RNA relationships
Source: eLife journal article supplement (doi:10.7554/elife.66525), 2021-08-27
Supplement: supp [file elife-66525-supp-v1.zip]

## H3N2 1995-2004 (SEM)

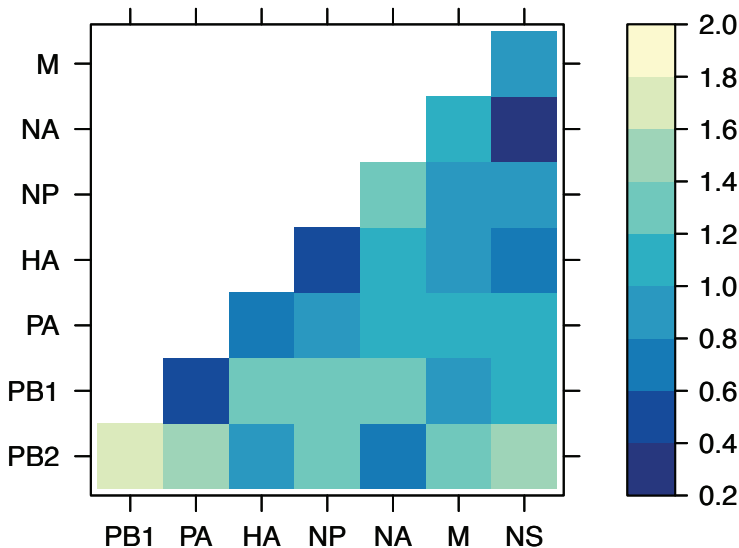

**Figure 3 - figure supplement 1. The standard error of the mean (SEM) of replicate Robinson-Foulds distances.** The SEM of all pairwise Robinson-Foulds distances (RF) was determined for H3N2 viruses from 1995-2004 (corresponding to the mean tree distances shown in Figure 3A).
