# Supplementary material for: Parallel evolution between genomic segments of seasonal human influenza viruses reveals RNA-RNA relationships
Source: eLife journal article supplement (doi:10.7554/elife.66525), 2021-08-27
Supplement: supp [file elife-66525-supp-v1.zip]

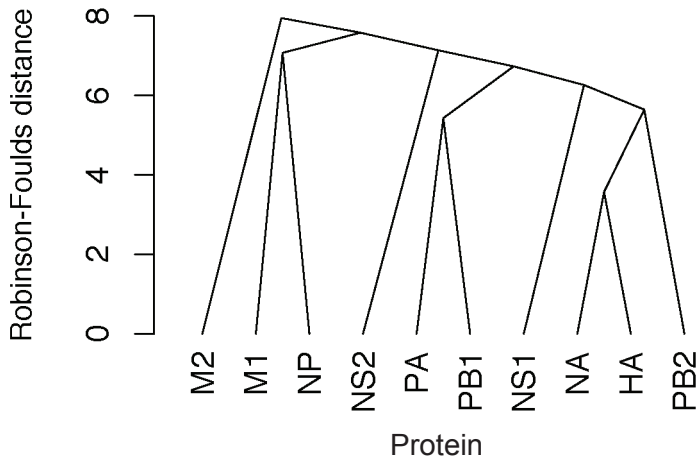

**Figure 6 - figure supplement 1. Parallel evolution between proteins in H3N2 viruses from 2005-2014.** H3N2 virus vRNA gene sequence alignments were translated into the corresponding amino acid alignments. Neighbor-joining trees were reconstructed from these alignments and the Robinson-Foulds distance (RF) was tabulated for all protein tree pairs. An RF network was constructed using a UPGMA tree. Scale bar corresponds to RF.
