# Supplementary material for: Parallel evolution between genomic segments of seasonal human influenza viruses reveals RNA-RNA relationships
Source: eLife journal article supplement (doi:10.7554/elife.66525), 2021-08-27
Supplement: supp [file elife-66525-supp-v1.zip]

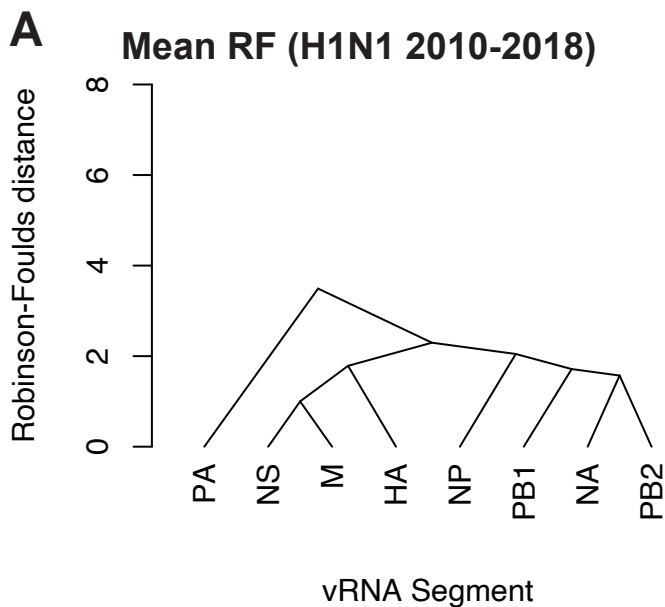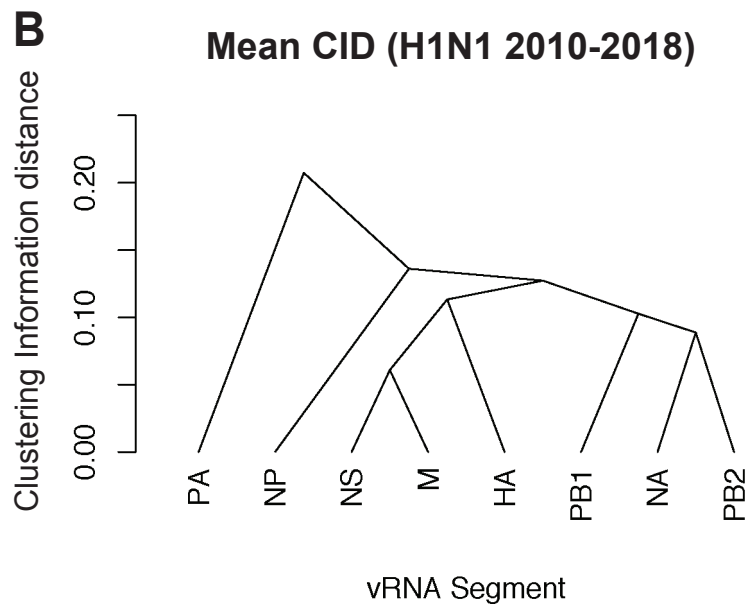

**Figure 5 - figure supplement 5. Networks determined from pairwise tree distances.** Overall vRNA relationships corresponding to H1N1 viruses from 2010-2018 were assessed with UPGMA trees derived from the mean RF corresponding to Figures 5A (**A**) or the CID corresponding to Figure 5 - figure supplement 2A (**B**). Scale bar corresponds to either RF or CID. The point at which edges merge is equivalent to 1/2 RF or 1/2 CID.
