# Supplementary material for: Parallel evolution between genomic segments of seasonal human influenza viruses reveals RNA-RNA relationships
Source: eLife journal article supplement (doi:10.7554/elife.66525), 2021-08-27
Supplement: supp [file elife-66525-supp-v1.zip]

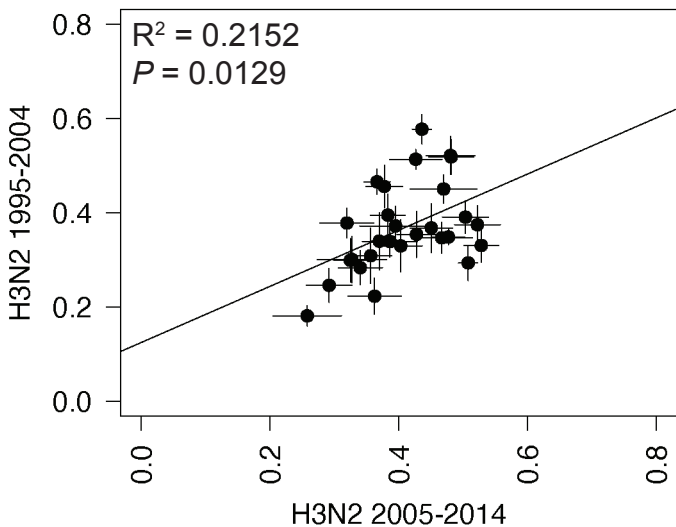

**Figure 3 - figure supplement 4. Linear regression of tree distances determined by Clustering Information Distances (CID).** Mean CID values of replicate trees from H3N2 viruses from 1995-2004 were plotted against those from H3N2 viruses from 2005-2014. The line of best fit was determined by linear regression (solid line). The  $R^2$  and  $P$ -value are indicated. Error bars indicate the SEM of all replicates.
