# Supplementary material for: Parallel evolution between genomic segments of seasonal human influenza viruses reveals RNA-RNA relationships
Source: eLife journal article supplement (doi:10.7554/elife.66525), 2021-08-27
Supplement: supp [file elife-66525-supp-v1.zip]

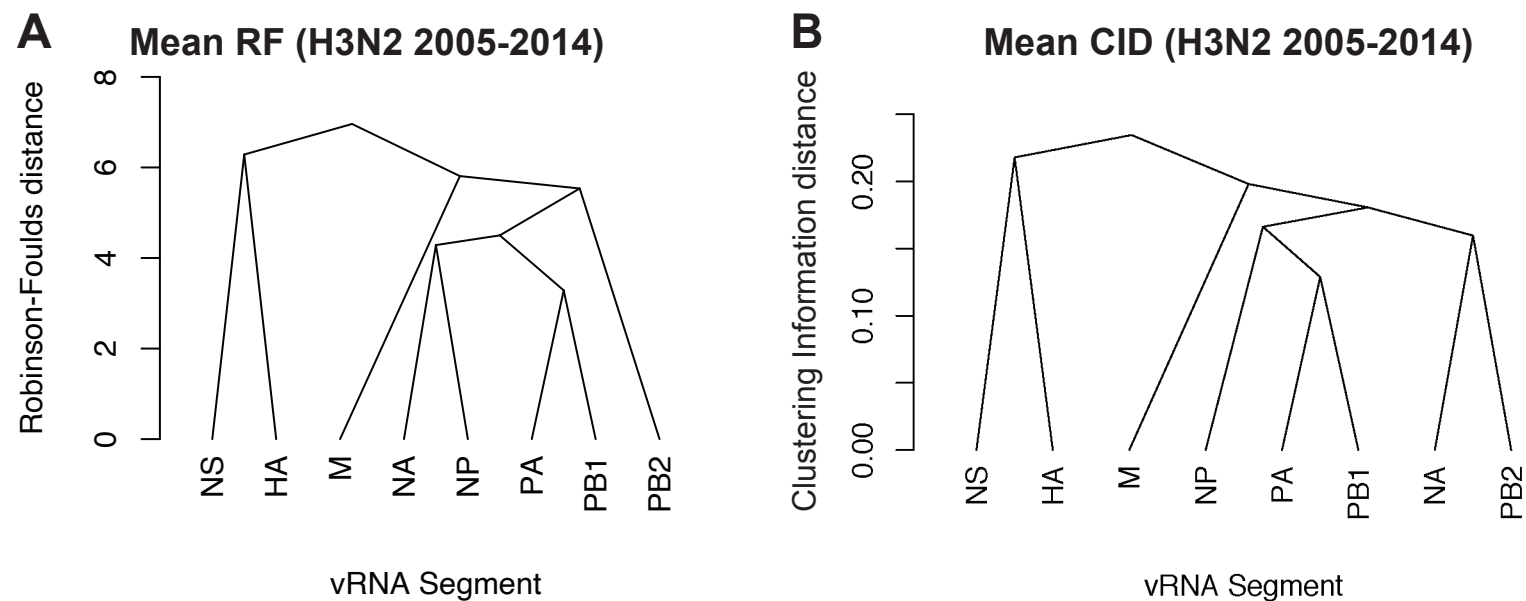

**Figure 2 - figure supplement 4. Networks determined from pairwise tree distances.** Overall vRNA relationships corresponding to H3N2 viruses from 2005-2014 were assessed with UPGMA trees derived from the mean RF corresponding to Figure 2C (**A**) or the mean CID corresponding to Figure 2 - figure supplement 2A (**B**). Scale bar corresponds to either RF or CID. The point at which edges merge is equivalent to 1/2 RF or 1/2 CID.
