# Supplementary material for: Parallel evolution between genomic segments of seasonal human influenza viruses reveals RNA-RNA relationships
Source: eLife journal article supplement (doi:10.7554/elife.66525), 2021-08-27
Supplement: supp [file elife-66525-supp-v1.zip]

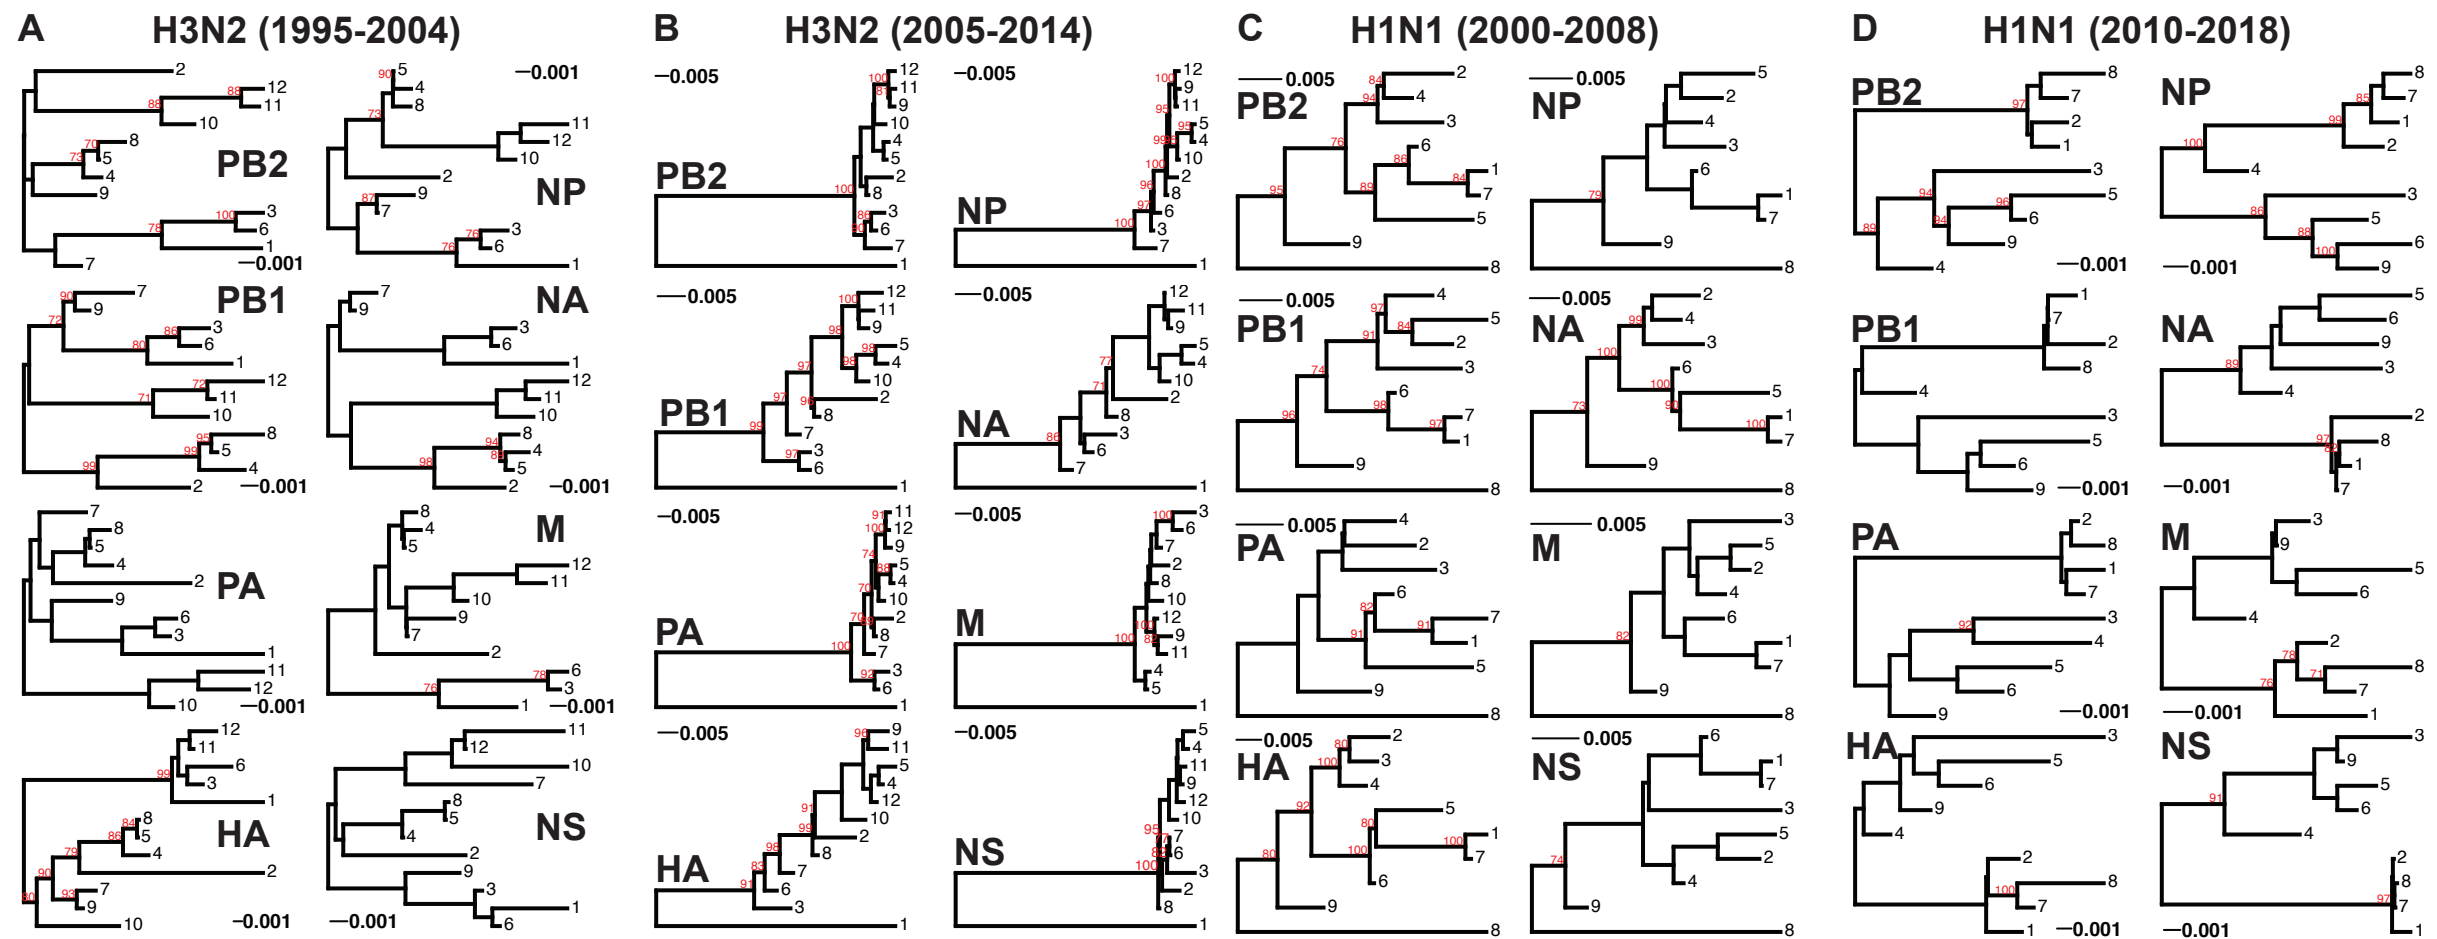

**Figure 1 - figure supplement 1. Genomic vRNA segment trees.** Maximum-likelihood phylogenetic reconstruction of each vRNA segment from H3N2 and H1N1 virus sequences shown in Supplementary Files 1-4. Representative trees from replicate 2 for H3N2 viruses from 1995-2004 (**A**), replicate 7 for H3N2 viruses from 2005-2014 (**B**), replicate 6 for H1N1 viruses from 2000-2008 (**C**), and replicate 3 for H1N1 viruses from 2010-2018 (**D**). Sequences are coded by cluster. Bootstrapping was performed with 100 replicates (bootstrap values greater than 70 are shown in red). Scale bars indicate percent divergence.
