# Supplementary material for: Parallel evolution between genomic segments of seasonal human influenza viruses reveals RNA-RNA relationships
Source: eLife journal article supplement (doi:10.7554/elife.66525), 2021-08-27
Supplement: supp [file elife-66525-supp-v1.zip]

**A Mean CID (H1N1 2000-2008)**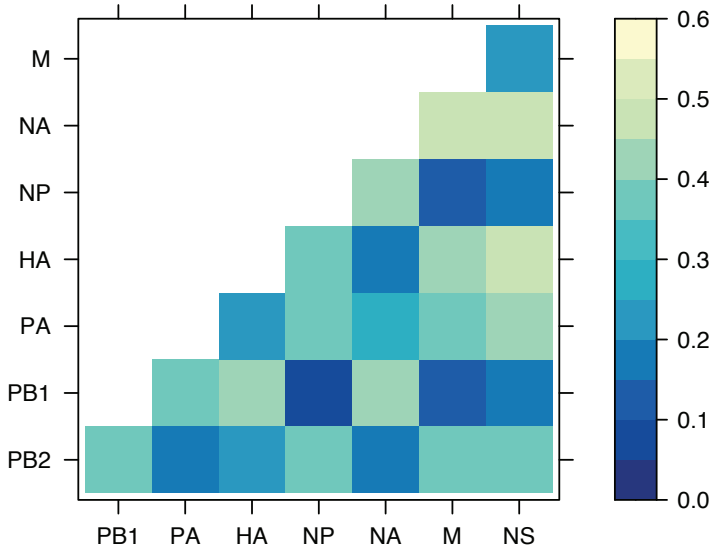**B SEM (H1N1 2000-2008)**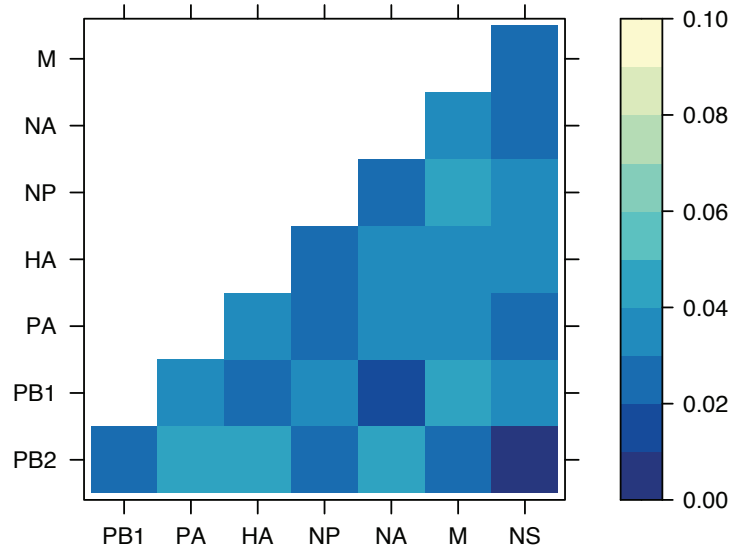

**Figure 4 - figure supplement 2. The mean clustering information distance (CID) of replicate vRNA trees.** The pairwise CID was calculated between each replicate vRNA tree from human H1N1 viruses from 2000-2008. The mean CID (**A**) and SEM of all pairwise CID (**B**) were visualized in a heatmap.
