# Supplementary material for: Parallel evolution between genomic segments of seasonal human influenza viruses reveals RNA-RNA relationships
Source: eLife. 2021 Aug 27;10:e66525. doi: 10.7554/eLife.66525 (PMC8523153; doi:10.7554/eLife.66525)
Supplement: Supplementary file 1. — Human H3N2 sequences from 1995 to 2004 were downloaded from the Influenza Research Database and full-length genomes were concatenated and grouped into operational taxonomic units (numbered 1–12 under Cluster ID) with at least 97% sequence identity. Representative sequences were selected from these clusters for further analysis. Each vertical column indicates one replicate (seven replicates total). [file elife-66525-supp1.xlsx]

## Sheet: Sheet1
H3N2	Representative strains analyzed in each replicate and the corresponding accession numbers.
1995-2004
Cluster ID	1	2	3	4	5	6	7
1	A/Christchurch/	A/New York/	A/Ashburton/	A/New York/	A/Christchurch/	A/New York/	A/Christchurch/
	339/2004	366/2004	280/2004	319/2004	14/2004	372/2004	13/2004
	CY002904 (HA),
	CY002977 - 83	CY002192 - 99	CY002954 - 61	CY002712 - 9	CY002922 - 9	CY002224 - 31	CY002906 - 13
2	A/Siena/	A/Netherlands/	A/Hong Kong/	A/Johannesburg/	A/Hong Kong/	A/Netherlands/	A/Finland/
	3/1995	5/1998	49/1995	10/1997	1/1997	1/1995	381/1995
	CY038503 - 10	CY114485 - 92	CY114205 -12	CY112853 - 60	CY112837 - 44	CY114221 - 8	CY114181 - 8
3	A/Netherlands/	A/New York/	A/New York/	A/Netherlands/	A/New York/	A/Wellington/	A/Fujian/
	213/2003	198/2003	32/2003	217/2003	204/2003	01/2004	445/2003
	HQ166049 - 56	CY001013 - 20	CY000025 - 32	CY112981 - 88	CY002520 - 7	CY012104 - 11	CY121448 - 55
4	A/New York/	A/New York/	A/New York/	A/New York/	A/New York/	A/New York/	A/New York/
	150/2000	316/1999	430/2000	171/1999	321/1999	142/2000	180/2000
	CY000465 - 72	CY002160 - 7	CY003448 - 55	CY000673 - 80	CY001864 - 71	CY001520 - 7	CY000737 - 44
5	A/Memphis/	A/New York/	A/New York/	A/New York/	A/New York/	A/New York/	A/New York/
	59/1999	250/1998	324/1999	456/1999	458/1999	278/1999	289/1998
	CY002112 - 9	CY001493 - 00	CY001976 - 83	CY003608 - 15	CY003624 - 31	CY001968 - 75	CY001784 - 91
6	A/Singapore/	A/Wyoming/	A/Taiwan/	A/Hong Kong/	A/Yucatan/	A/Hong Kong/	A/Hong Kong/
	1/1996	03/2003	9/2004	HKU19/2004	844/2003	HKU20/2004	HKU29/2004
	CY112829 - 36	CY034108 - 15	CY040082 - 9	CY038607 - 14	CY032961 - 8	CY038615 - 22	CY038631 - 8
7	A/Malaysia/	A/South Carolina/	A/Auckland/	A/HaNoi/	A/California/	A/Illinois/	A/Georgia/
	12974/1999	NHRC0001/1999	10/1997	1766/2001	32/1999	NHRC0001/1999	NHRC0001/1999
	CY118562 - 9	CY090901 - 8	CY114293 - 00	CY105190 - 7	CY121424 - 31	CY090893 - 00	CY090885 - 92
8	A/New York/	A/Malaysia/	A/Malaysia/	A/Panama/	A/New York/	A/New York/	A/New York/
	435/2000	10877/1999	10997/1999	2007/1999	526/1997	502/1998	513/1997
	CY006659 - 66	CY118482 - 9	CY118498 - 05	CY034100 - 7	CY007979 - 86	CY008180 - 7	CY006267 - 74
9	A/New York/	A/New South Wales/	A/New York/	A/Dunedin/	A/Waikato/	A/Wellington/	A/New South Wales/
	247/1998	15/1999	601/1996	1/2000	6/2000	21/2000	4/1999
	CY001504 - 11	CY016539 - 46	CY015516 - 23	CY012616 - 23	CY013048 - 55	CY019989 - 96	CY016627 - 34
10	A/New York/	A/New York/	A/New York/	A/New York/	A/New York/	A/New York/	A/New York/
	100/2002	110/2002	192/2003	213/2003	71/2001	193/2003	99/2002
	CY000225 - 32	CY000113 - 20	CY000753 - 60	CY001405 - 12	CY000481 - 8	CY000865 - 72	CY001080 - 7
11	A/New York/	A/Mexico/	A/New York/	A/New York/	A/New York/	A/New York/	A/New York/
	11/2003	DIF2662/2003	22/2003	46/2003	10/2004	59/2003	65/2003
	CY000513 - 20	KJ855448 - 55	CY000361 - 8	CY000785 - 92	CY000761 - 8	CY000957 - 64	CY001221 - 8
12	A/England/	A/England/	A/Scotland/	A/England/	A/Scotland/	A/England/	A/England/
	431/2003	442/2003	76/2003	567/2003	78/2003	787/2003	518/2003
	CY087979 - 86	CY088019 - 26	CY088123 - 30	CY088347 - 54	CY088131 - 38	CY088211 - 18	CY088203 - 10
