# Supplementary material for: Parallel evolution between genomic segments of seasonal human influenza viruses reveals RNA-RNA relationships
Source: eLife. 2021 Aug 27;10:e66525. doi: 10.7554/eLife.66525 (PMC8523153; doi:10.7554/eLife.66525)
Supplement: Supplementary file 2. — Human H3N2 sequences from 2005 to 2014 were downloaded from the Influenza Research Database and full-length genomes were concatenated and grouped into operational taxonomic units (numbered 1–12 and labeled Cluster ID) with at least 97% sequence identity. Representative sequences were selected from these clusters for further analysis. Each vertical column indicates one replicate (seven replicates total). Asterisks (*) denote H3N2v (variant) strains. [file elife-66525-supp2.xlsx]

## Sheet: Sheet1
H3N2	Representative strains analyzed in each replicate and the corresponding accession numbers.
2005-2014
Cluster ID	1	2	3	4	5	6	7
1	*A/Indiana/	*A/Minnesota/	*A/Ontario/	*A/Ontario/	*A/Indiana/	*A/Indiana/	*A/Iowa/
	21/2012	11/2010	1252/2007	RV1273/2005	8/2011	10/2011	07/2011
	KJ942688 - 95	KJ942624 - 31	EU399751 - 8	DQ469955 - 62	JQ070793 - 800	JN992753,	JQ290173 - 80
						JQ070778,
						JQ070780 - 1,
						JQ070792,
						KJ942594,
						KJ942598 - 9
2	A/Singapore/	A/Singapore/	A/Soledade/	A/Nanjing/	A/Nanjing/	A/Nanjing/	A/Qinghai/
	139N/2007	25Z/2007	LACENRS-820/2011	1654/2010	1655/2010	1663/2010	178/2010
	KF533055,	KF533050,	KY924952,	HQ664919,	HQ664914 - 18,	HQ664929 - 35,	KY049985 - 92
	KF533061, KF836400,	KF533056,	KY925128,	HQ664922 - 28	HQ664920 - 21,	HQ664937
	KF836413,	KF836394,	KY925167,		HQ664936
	KP223213, KP223232,	KF836409,	KY925402,
	KP223252,	KP223170,	KY925635,
	KP223178	KP223205,	KY925943,
		KP223224,	KY926297,
		KP223244	KY926359
3	A/South Australia/	A/Hong Kong/	A/Quebec/	A/New York/	A/New York/	A/New York/	A/Quebec/
	22/2005	HKU44/2005	26-281106/2006	359/2005	391/2005	465/2005	26-031205/2005
	CY017131 - 8	CY039175 - 82	KM438087,	CY002000 - 7	CY002056 - 63	CY006084 - 91	KM438091,
			KM438105,				KM438101,
			KM438116,				KM438112,
			KM438129,				KM438125,
			KM438140,				KM438136,
			KM438152,				KM438148,
			KM438164,				KM438163,
			KM438176				KM438175
4	A/Connecticut/	A/DC/	A/Porto Alegre/	A/Santa Cruz/	A/Canoas/	A/Arvorezinha/	A/Alegrete/
	Flu086/2012	1/2014	LACENRS-2376/2014	2821/2012	LACENRS-1317/2014	LACENRS-2055/2013	LACENRS-1624/2014
	KM654605,	KU888850 - 7	KY925119,	KF612183,	KY925875,	KY925028,	KY925158,
	KM654653,		KY925301,	KF612187,	KY925904,	KY925428,	KY925257,
	KM654723,		KY925321,	KF612190,	KY925907,	KY925762,	KY925311,
	KM654771,		KY925689,	KF612194,	KY924954,	KY925949,	KY925323,
	KM654793,		KY925806,	KF612198,	KY925991,	KY925989,	KY925352,
	KM654839,		KY926038,	KF612202,	KY926059,	KY926006,	KY925358,
	KM654891,		KY926104,	KF612206,	KY926164,	KY926151,	KY926147,
	KM654963		KY926418	KF612210	KY926208	KY926211	KY926192
5	A/Saudi Arabia/	A/Kuwait/	A/Michigan/	A/Nevada/	A/Maine/	A/Hawaii/	A/Arkansas/
	05/2013	F099/2014	08/2014	18/2014	06/2014	39/2014	01/2014
	KY681482,	KT888170,	KR057640 - 7	KT838445,	KT837919,	KR057629 - 36	KT937141 - 2,
	KY681507,	KT888246,		KT838562,	KT837922,		KT837149,
	KY681532,	KT888294,		KT838565,	KT837985,		KT837166,
	KY681557,	KT888454,		KT838582,	KT837992,		KT837209,
	KY681582,	KT888521,		KT838592,	KT838047,		KT837220,
	KY681607,	KT888867,		KT838601,	KT838108,		KT837233,
	KY681632,	KT889001,		KT838697,	KT838149		KT837259
	KY681657	KT889268		KT838722	KT838177
6	A/New York/	A/South Carolina/	A/Texas/	A/Illinois/	A/HaNoi/	A/Netherlands/	A/Georgia/
	933/2006	NHRC0001/2005	NHRC0001/2006	NHRC0001/2005	ISBM16/2005	42/2006	NHRC0001/2005
	CY019333,	CY090989 - 96	CY091037 - 44	CY091005 - 12	CY104212 - 9	CY114389 - 96	CY091125 - 32
	CY019336 - 40,
	CY019845,
	CY020102,
7	A/Queensland/	A/Otago/	A/New York/	A/Taiwan/	A/New York/	A/Western Australia/	A/Hong Kong/
	52/2005	1/2005	7/2006	70002/2007	1009/2006	69/2005	HKU66/2005
	CY017989 - 96	CY014039 - 46	CY014159 - 66	CY039399 - 406	CY172231 -8	CY016979 - 86	CY039247 - 54
8	A/Florida/	A/New York/	A/Brisbane/	A/Thailand/	A/Mexico/	A/Uruguay/	A/Pennsylvania/
	22/2009	3738/2009	10/2007	CU-1102/2008	24025/2009	716/2007	PIT04/2008
	JX905397 - 9,	CY050820 - 7	CY039089,	EU625364,	CY147723 - 30	CY121635 - 9,	CY036927 - 34
	JX905401 - 3,		CY039094,	EU625367,		EU716426 - 7,
	JX905407 - 8		KJ609212 - 5,	FJ913003 - 8		EU716434
			KJ609217 - 8
9	A/Sydney/	A/New York/	A/Brisbane/	A/Canberra/	A/Nicaragua/	A/Houston/	A/Chicago/
	156/2014	WC-LVD-14-073/2014	341/2014	82/2014	7945_05/2014	JMM_170/2013	YGA_04046/2012
	CY252023 - 30	CY207355 - 62	CY252143 - 50	CY251959 - 66	CY240571 - 8	CY186179 - 86	CY171215 - 22
10	A/Canberra/	A/Brisbane/	A/Peru/	A/Parma/	A/South Australia/	A/Victoria/	A/Boston/
	35/2012	21/2012	PER041/2011	22/2012	2/2013	120/2012	YGA_00046/2013
	CY251175 - 82	CY250865 - 72	CY160608 - 15	KU322183,	CY251423 - 30	CY251151 - 8	CY168167 - 74
				KU322225,
				KU322268,
				KU322311,
				KU322354,
				KU322397,
				KU322440,
				KU322483
11	A/Cambodia/	A/Netherlands/	A/Rhode Island/	A/Chicago/	A/Boston/	A/Victoria/	A/South Australia/
	V1012345/2011	034/2010	09/2012	YGA_04114/2012	DOA2-097/2012	1003/2012	8/2013
	KU299790 - 7	CY114509 - 16	CY264630,	CY171479 - 86	CY148300 - 7	CY251375 - 82	CY251479 - 86
			CY264632,
			CY264634 - 5,
			KF789834,
			KY116965,
			KY116967,
			KY116971
12	A/Texas/	A/Santa Clara/	A/Nicaragua/	A/Nicaragua/	A/Boston/	A/Texas/	A/Boston/
	JMM_24/2012	YGA_03020/2013	6777_01_TR1/2013	30071_01_TR1/2013	DOA2-232/2013	JMM_21/2012	DOA2-245/2013
	CY134900 - 7	CY170599 - 606	CY189687 - 94	CY189751 - 8	CY149228 - 35	CY134876 - 83	CY149316 - 23
