# Supplementary material for: Parallel evolution between genomic segments of seasonal human influenza viruses reveals RNA-RNA relationships
Source: eLife. 2021 Aug 27;10:e66525. doi: 10.7554/eLife.66525 (PMC8523153; doi:10.7554/eLife.66525)
Supplement: Supplementary file 3. — Human H1N1 sequences from 2000 to 2008 were downloaded from the Influenza Research Database and full-length genomes were concatenated and grouped into operational taxonomic units (numbered 1–9 under Cluster ID) with at least 97% sequence identity. Representative sequences were selected from these clusters for further analysis. Each vertical column indicates one replicate (seven replicates total). [file elife-66525-supp3.xlsx]

## Sheet: Sheet1
H1N1	Representative strains analyzed in each replicate and the corresponding accession numbers.
2000-2008
Cluster ID	1	2	3	4	5	6	7
1	A/South Korea/	A/Taiwan/	A/Taiwan/	A/Taiwan/	A/Taiwan/	A/Taiwan/	A/Taiwan/
	AF10/2008	0045/2006	0586/2006	192/2006	2823/2008	2832/2008	8885/2008
	CY044349 - 56	HQ291849,	HQ291848,	HQ291869,	HQ291853,	HQ291862,	HQ291856,
		HQ291874,	HQ291876,	HQ291875,	HQ291880,	HQ291883,	HQ291889,
		HQ291899,	HQ291901,	HQ291900,	HQ291907,	HQ291908,	HQ291914,
		HQ291924,	HQ291923,	HQ291944,	HQ291928,	HQ291937,	HQ291931,
		HQ291949,	HQ291951,	HQ291950,	HQ291957,	HQ291958	HQ291964,
		HQ291974,	HQ291973,	HQ291994,	HQ291978,	HQ291987,	HQ291981
		HQ291999,	HQ291998,	HQ292019,	HQ292003,	HQ292012,	HQ292006,
		HQ292024	HQ292023	HQ292044	HQ292018	HQ292037	HQ292031
2	A/New York/	A/Tennessee/	A/Kentucky/	A/Ohio/	A/Oregon/	A/Kansas/	A/Texas/
	1066/2007	UR06-0076/2007	UR06-0258/2007	UR06-0411/2007	UR06-0609/2007	UR06-0102/2007	UR06-0323/2007
	CY172655 - 62	CY028107 - 14	CY028163 - 70	CY027987 - 94	CY033465 - 72	CY031534 - 7,	CY041442 - 9
						CY031551 - 4
3	A/Texas/	A/Texas/	A/Texas/	A/Texas/	A/Texas/	A/Texas/	A/Memphis/
	UR06-0503/2007	UR06-0542/2007	UR06-0468/2007	UR06-0467/2007	UR06-0420/2007	UR06-0026/2007	5/2003
	CY027883 - 90	CY026339 - 46	CY026499 - 506	CY025445 - 52	CY028219 - 26	CY028323 - 30	CY019883 - 90
4	A/Netherlands/	A/New York/	A/New York/	A/New York/	A/Hanoi/	A/TayNguyen/	A/Christchurch/
	26/2007	443/2001	220/2002	230/2003	ISBM31/2005	TN334/2005	1/2003
	HQ166041 - 8	CY003472 - 9	CY002528 - 35	CY002624 - 31	CY104822 - 9	CY105350 - 7	CY125188 - 95
5	A/Tottori/	A/Nagasaki/	A/Kyoto/	A/Niigata/	A/New York/	A/DaNang/	A/ThaiBinh/
	08T010/2008	07N035/2008	07K454/2008	07F102/2008	08-1326/2008	DN467/2008	TB289/2008
	CY043550 - 7	CY043486 - 93	CY043454 - 61	CY043382 - 9	JN582059 - 66	CY104934 - 41	CY105126 - 33
6	A/Singapore/	A/Malaysia/	A/Malaysia/	A/Hong Kong/	A/Canada/	A/Canterbury/	A/Malaysia/
	14/2001	33166/2005	34450/2006	2637/2004	591/2004	106/2004	1706215/2007
	CY125148 - 55	CY119186 - 93	CY119194 - 201	CY125204 - 11	CY125196 - 203	CY007467 - 74	CY119226 - 33
7	A/Gunma/	A/Kyoto/	A/Nagasaki/	A/Niigata/	A/Niigata/	A/Hong Kong/	A/Hue/
	07G002/2008	07K303/2008	07N005/2008	07F191/2008	07F125/2008	1870/2008	H259/2008
	CY043406 - 13	CY043438 - 45	CY043462 - 9	CY043398 - 405	CY043390 - 7	CY121648 - 55	CY104958 - 65
8	A/Chile/	A/South Australia/	A/South Australia/	A/South Australia/	A/South Australia/	A/South Australia/	A/South Australia/
	4795/2000	25/2000	26/2000	29/2000	30/2000	36/2000	64/2000
	CY125132 - 39	CY017139 - 46	CY017379 - 86	CY017019 - 26	CY017813 - 20	CY017147 - 54	CY016731 - 8
9	A/Taiwan/	A/Canterbury/	A/Wellington/	A/Canterbury/	A/Russia/	A/New York/	A/New York/
	141/2002	152/2001	17/2001	47/2001	2187/2002	306/2001	205/2001
	CY084228 - 35	CY011088 - 95	CY012304 - 11	CY010252 - 9	CY125164 - 71	CY003400 - 7	CY001952 - 9
