# Supplementary material for: Parallel evolution between genomic segments of seasonal human influenza viruses reveals RNA-RNA relationships
Source: eLife. 2021 Aug 27;10:e66525. doi: 10.7554/eLife.66525 (PMC8523153; doi:10.7554/eLife.66525)
Supplement: Supplementary file 4. — Human H1N1 sequences from 2010 to 2018 were downloaded from the Influenza Research Database and full-length genomes were concatenated and grouped into operational taxonomic units (numbered 1–9 under Cluster ID) with at least 97% sequence identity. Representative sequences were selected from these clusters for further analysis. Each vertical column indicates one replicate (seven replicates total). [file elife-66525-supp4.xlsx]

## Sheet: Sheet1
H1N1	Representative strains analyzed in each replicate and the corresponding accession numbers.
2010-2018
Cluster ID	1	2	3	4	5	6	7
1	A/Gramado/	A/Taipei/	A/Vacaria/	A/Torres/	A/Baltimore/	A/Taipei/	A/Baltimore/
	LACENRS-1287/2016	0045/2016	LACENRS-495/2016	LACENRS-1102/2016	0107/2016	0046/2016	0008/2016
	KY925104,	KY487178,	KY925355,	KY925032,	KY487084,	KY487170,	KY487127,
	KY925179,	KY487296,	KY925365,	KY925049,	KY487183,	KY487436,	KY487343,
	KY925188,	KY487367,	KY925611,	KY925190,	KY487439,	KY487504,	KY487410,
	KY925751,	KY487426,	KY925636,	KY925284,	KY487451,	KY487531,	KY487491,
	KY925798,	KY487456,	KY925736,	KY925584,	KY487472,	KY487560,	KY487576,
	KY925960,	KY487565,	KY925871,	KY926217,	KY487556,	KY487635,	KY487604,
	KY926084,	KY487602,	KY926039,	KY926257,	KY487562,	KY487734,	KY487672,
	KY926299	KY487714	KY926287	KY926372	KY487722	KY487740	KY487698
2	A/Minnesota/	A/Florida/	A/Hawaii/	A/Florida/	A/Florida/	A/Washington/	A/North Carolina/
	35/2017	95/2015	83/2015	83/2015	12/2016	1/2017	12/2016
	CY243771 - 8	KX004656 - 63	KX004967 - 74	KX005095,	KX406328 - 35	CY218075 - 82	KX407448 - 55
				KX005097 - 8,
				KX005100,
				KX005102,
				KX005472,
				KX005475,
				KX005477
3	A/Warsaw/	A/Khon Kaen/	A/Chicago/	A/Tennessee/	A/Lima/	A/Bronx/	A/Georgia/
	INS3_657/2011	INS3_649/2012	YGA_04019/2012	F2068/2011	INS3_677/2012	INS3_673/2012	M5081/2012
	CY176594 - 601	CY176538 - 45	CY171159 - 66	CY167660 - 7	CY176722 - 9	CY176690 - 7	CY147964,
							CY147998,
							CY148061,
							CY148064,
							CY148081,
							CY148159,
							CY148163,
							CY148218
4	A/Helsinki/	A/Helsinki/	A/Helsinki/	A/Helsinki/	A/Helsinki/	A/Helsinki/	A/Helsinki/
	848/2013	804/2013	911/2013	100/2013	1199/2012	205/2013	737/2013
	KF560110 - 7	KF560054 - 61	KF560158 - 65	KF559390 - 7	KF560278 - 85	KF559438 - 45	KF559990 - 7
5	A/Parma/	A/Parma/	A/Parma/	A/Parma/	A/Singapore/	A/Singapore/	A/Singapore/
	644/2010	7/2011	48/2011	126/2011	GP917/2011	GP887/2011	GP767/2011
	KU322148,	KU322178,	KU322176,	KU322173,	CY124683 - 90	CY124663 - 70	CY124611 - 8
	KU322190,	KU322220,	KU322218,	KU322215,
	KU322233,	KU322263,	KU322261,	KU322258,
	KU322276,	KU322306,	KU322304,	KU322301,
	KU322319,	KU322349,	KU322347,	KU322344,
	KU322362,	KU322392,	KU322390,	KU322387,
	KU322405,	KU322435,	KU322433,	KU322430,
	KU322448	KU322478	KU322476	KU322473
6	A/Bangkok/	A/Sydney/	A/Texas/	A/Bangkok/	A/Vienna/	A/Berlin/	A/Athens/
	INS478/2010	DD3-37/2010	JMS413/2010	INS424/2010	INS368/2010	INS430/2010	INS396/2010
	CY096298 - 305	CY092638 - 45	CY061187 - 94	CY071327 - 34	CY071055 - 62	CY071375 - 82	CY071167 - 74
7	A/NewYork/	A/Alaska/	A/NewYork/	A/NewYork/	A/NewYork/	A/NewYork/	A/NewYork/
	A-WC-LVD-16-067/2016	263/2015	A-WC-LVD-16-040/2016	A-WC-LVD-16-018/2016	A-WC-LVD-16-016/2016	A-WC-LVD-16-053/2016	A-WC-LVD-16-014/2016
	CY259847 - 54	KU509765 - 7,	CY259655 - 62	CY258913 - 20	CY259463 - 70	CY259751 - 8	CY259447 - 54
		KU509771,
		KX004187 - 8,
		KX004696,
		KX004702
8	A/Mexico/	A/Mexico/	A/Mexico/	A/Mexico/	A/Mexico/	A/Mexico/	A/Mexico/
	8017/2017	4436/2016	8517/2017	4687/2017	4435/2016	4440/2016	17517/2017
	MF593572 - 9	MF593514 - 21	MF593580 - 7	MF593551 - 8	MF593506 - 13	MF593522 - 9	MF593617 - 24
9	A/Thailand/	A/Milano/	A/Taiwan/	A/Indiana/	A/Michigan/	A/Pennsylvania/	A/Budapest/
	SN11783/2012	21/2012	1829/2011	4/2011	3/2011	7/2011	WRAIR3789T/2011
	KP637595 - 602	KU321908,	JQ693691,	KC882315,	KC882264,	KC881821 - 4,	CY097977 - 84
		KU321939,	JQ693701,	KC882319 - 21,	KC882275 - 80,	KC882000,
		KU321971,	JQ693711,	KC882343 - 5,	KC882296	KC882022 - 3,
		KU322003,	JQ693721,	KC882371		KC882124
		KU322033,	JQ693731
		KU322065,	JQ693741,
		KU322097,	JQ693751,
		KU322129	JQ693761
