# Supplementary material for: Parallel evolution between genomic segments of seasonal human influenza viruses reveals RNA-RNA relationships
Source: eLife. 2021 Aug 27;10:e66525. doi: 10.7554/eLife.66525 (PMC8523153; doi:10.7554/eLife.66525)
Supplement: Supplementary file 5. — Custom oligonucleotide probes targeting PB2 (A), NA (B), and NS (C) vRNA were designed from A/Panama/2007/1999 (H3N2) virus sequences using the Stellaris probe designer (BioSearch Technologies). Oligos exhibiting significant complementarity against other vRNA segments and/or positive-strand complementarity were excluded. [file elife-66525-supp5.xlsx]

## Sheet: Sheet1
PB2		NA		NS
Sequence	Location	Sequence	Location	Sequence	Location
cagaagatacggaccagcat	193	atgcctatataagctttcgc	30	gctgtttgaagtggaacagg	56
attctcggaaaagatgccgg	297	tgatggggcggacatcaatc	52	ggctgattgaagaagtgaga	138
cagttctcttcattgactgt	402	attgttgtgttttgtggcac	102	aatggcgagaacagctaggt	180
catttgataccacccagata	470	aagtctggtggacctcaaac	125	tctacagagattcgcttgga	252
acagtgggtttgtcagaact	521	gcatcaatcggtgcttttat	179	ctcaccattgccttcttttc	363
tttagttcctaaggccatta	550	gtattttctctgttgaaggc	206	agggagcagttgttggcgaa	385
ctcatcgtcaatgatgtggg	703	agaggtaatatgtccggtta	231	tgaccgactagagaccatag	429
ttattatctcctgaggaggt	762	ggtccaaacctaactccaaa	281	gacccctttgcatcagaatg	505
tcgagaccaacgtgggaatg	784	accttcaaggtcattgaagg	303	atgcccaagcaaaaagtgga	527
tggttagcattgatcggttt	812	agaagtcacgctcaggttat	326	ctgcttcgcgatacataact	589
gtgtggatgaatactccagt	845	agggggtcatggagtgaaag	397	taaaatgaccatggcctcca	612
taccagatatgactccaagc	905	aaaacgacagctccagcagt	446	aggaagaatctgatgaggca	634
agccgaagcaataatcgtgg	1114	agcattgtttccagttatgt	498	cccatgttggaaagcagatt	670
gtgagtggaagggacgaaca	1140	taggcccatcgtagatataa	532	ggtctagacatcaaagcagc	692
gcagaacccgactgaagaac	1399	gagacaactggaaaggctcc	554	aaggggaagaggcaacactc	714
agtatcagcagatccactag	1483	gcaaattgtcaggaagtgct	632	tttccaggtagattgctttc	819
attattgcagccaggaacat	1518	acttttcattgaggagggga	667	atggattccaacactgtgtc	842
gactcaaggaacgtgttggg	1594	gcttcaggaagagctgatac	693
ggagccaggatactaacatc	1779	tcggaatgcgtttgtatcaa	747
gtcaagatacgccgaagagt	1881	aaaaatcctcaggacccagg	769
aatggacccgtgacaagtac	1992	atagtattggttcatggtcc	791
cccgtcacttaggatgaaat	2170	gcttcatttacgatgggaga	818
tacacatcagggagacagga	2196	ctgggcatgatgaaaatgca	845
		aaagcatggctgcatgtttg	870
		cagctcaagttgtcacgatg	892
		tttgggaaccaagcaagtgt	925
		atgaatgagttgggtgttcc	951
		gcgatcctgacaagtgttat	1058
		taattcaattcggctttccg	1120
		aggatttgcacctttttcta	1144
		tggtcaaagccgcaatgtaa	1170
		tagtgtatctgaccaacacc	1235
		acaaccaagtaatgctgtgt	1289
		aatagccatcctggtaacta	1354
		cactattgccacaatatgct	1384
		taacgattggctctgtttct	1406
