# Supplementary material for: Parallel evolution between genomic segments of seasonal human influenza viruses reveals RNA-RNA relationships
Source: eLife. 2021 Aug 27;10:e66525. doi: 10.7554/eLife.66525 (PMC8523153; doi:10.7554/eLife.66525)
Supplement: Supplementary file 6. — A Mann-Whitney U test was performed to determine whether pairwise Robinson-Foulds distance (RF) of H3N2 viruses from 1995 to 2004 were significantly different from pairwise RF of H3N2 viruses from 2005 to 2014 (left) and whether pairwise RF of H1N1 viruses from 2000 to 2008 were significantly different from pairwise RF of H1N1 viruses from 2010 to 2018 (right). The ‘p-adj’ indicates adjusted p-values after Benjamini-Hochberg correction. [file elife-66525-supp6.xlsx]

## Sheet: Sheet1
H3N2			H1N1
Segments	P-value	P-adj	Segments	P-value	P-adj
NA-NS	0.001528	0.016808	PB1-NP	0.001414	0.015554
PA-NS	0.001775	0.019525	HA-NS	0.001432	0.015752
PB1-NS	0.00221	0.02431	NA-NS	0.001588	0.017468
NP-NS	0.004299	0.047289	NA-M	0.0029	0.0319
M-NS	0.01101	0.12111	PB2-PA	0.003173	0.034903
NP-M	0.0199	0.2189	PB2-NP	0.00335	0.03685
PA-NA	0.03849	0.42339	PA-NA	0.003435	0.037785
PA-NP	0.06446	0.70906	HA-M	0.003833	0.042163
PB2-NP	0.06827	0.75097	PB2-NS	0.003933	0.043263
PB2-NS	0.06953	0.76483	PB1-NA	0.003977	0.043747
PB2-PA	0.06987	0.06987	NP-NA	0.003977	0.043747
PB2-M	0.08714	---	PB1-M	0.005777	---
PB1-M	0.1152	---	NP-M	0.006065	---
PB2-HA	0.152	---	PB2-PB1	0.009504	---
PA-M	0.1676	---	PB1-HA	0.01045	---
PB2-PB1	0.1749	---	PB2-M	0.01162	---
HA-NS	0.1999	---	HA-NP	0.02228	---
PA-HA	0.216	---	PA-HA	0.0504	---
PB1-PA	0.2913	---	PA-NP	0.06177	---
HA-M	0.293	---	NP-NS	0.1307	---
PB2-NA	0.3461	---	HA-NA	0.1665	---
NA-M	0.349	---	PB1-NS	0.2549	---
PB1-NA	0.4613	---	M-NS	0.2975	---
NP-NA	0.4629	---	PA-NS	0.5127	---
HA-NA	0.7413	---	PA-M	0.5377	---
PB1-HA	0.948	---	PB2-HA	0.549	---
PB1-NP	1	---	PB1-PA	0.5852	---
HA-NP	1	---	PB2-NA	0.7885	---
